# Supplementary material for: High-valent oxovanadium metallosupramolecular species as catalysts for the oxidation of benzyl alcohol derivatives
Source: Royal Society of Chemistry journal article supplement (doi:10.1039/d4ra09073j), 2025-01-01
Supplement: d4ra09073j1.pdf [file d4ra09073j1.pdf]

## SUPPORTING INFORMATION

### High-valent oxovanadium metallosupramolecular species as catalysts for the oxidation of benzyl alcohol derivatives

Edi Topić,<sup>a</sup> Josipa Sarjanović,<sup>a</sup> Danijela Musija,<sup>b</sup> Mirna Mandarić,<sup>a</sup> Tomica Hrenar,<sup>a</sup> Jana Pisk,<sup>\*a</sup> and Višnja Vrdoljak<sup>\*a</sup>

#### Table of Contents

|                                               |           |
|-----------------------------------------------|-----------|
| <b>1. Characterization of compounds</b> ..... | <b>2</b>  |
| <b>1.1. PXRD</b> .....                        | <b>4</b>  |
| <b>1.2. SCXRD</b> .....                       | <b>7</b>  |
| <b>1.3. UV-Vis</b> .....                      | <b>20</b> |
| <b>1.4. NMR spectroscopy</b> .....            | <b>23</b> |
| <b>1.5. ATR-IR spectroscopy</b> .....         | <b>25</b> |
| <b>1.6. TGA</b> .....                         | <b>27</b> |

---

<sup>a</sup>University of Zagreb, Faculty of Science, Department of Chemistry, Horvatovac 102a, 10000 Zagreb, Croatia; E-mail: [visnja.vrdoljak@chem.pmf.hr](mailto:visnja.vrdoljak@chem.pmf.hr)

<sup>b</sup>University of Zagreb, School of Medicine, Department of Chemistry and Biochemistry, Šalata 3, 10000 Zagreb, Croatia.

## 1. Characterization of compounds

**Elemental analyses** (C, H, and N) were performed by the Analytical Services Laboratory of Rudjer Bošković Institute, Zagreb.

**Powder X-ray diffraction (PXRD)** data were collected on a Malvern Panalytical Aeris diffractometer in the Bragg-Brentano geometry using  $\text{CuK}\alpha$  radiation ( $\lambda = 1.5406 \text{ \AA}$ ). Powder patterns were collected at room temperature in the region between  $5^\circ$  and  $40^\circ$  ( $2\theta$ ). The data were collected and visualized using the Malvern Panalytical HighScore Software Suite.<sup>1</sup>

### Single crystal diffraction (SCXRD)

High-quality single crystals were grown in a way described in the manuscript. Diffracted intensities were collected on Rigaku XtaLAB Synergy-S diffractometer equipped with Dualflex source ( $\text{CuK}\alpha$  radiation,  $\lambda = 1.54184 \text{ \AA}$ ), and HyPix detector using  $\omega$ -scans. The crystals were kept at 170 K during data collection. Data were prepared using the CrysAlis program package.<sup>2</sup> The structures were solved with dual space methods using SHELXT.<sup>3</sup> The refinement procedure by full-matrix least-squares methods based on  $F^2$  values against all reflections included anisotropic displacement parameters for all non-H atoms. Hydrogen atoms bound to carbon atoms were placed in geometrically idealized positions and refined using the riding model with  $U_{\text{iso}} = 1.2U_{\text{eq}}$  of the connected carbon atom or as ideal  $\text{CH}_3$  groups with  $U_{\text{iso}} = 1.5U_{\text{eq}}$ . Where possible, hydrogen atoms attached to heteroatoms were located in the difference Fourier maps at the final stages of the refinement procedure. Disorder of alkoxy chains of **1 $\beta$** , **2 $\beta$**  and **5 $\beta$**  was modelled in two orientations based on peaks in difference Fourier map. Void volume electron density in **1t**, **1 $\beta$** , **2 $\beta$**  and **5 $\beta$**  was modelled using solvent mask as implemented in Olex2. All refinements were performed using SHELXL.<sup>4</sup> The SHELX programs operated within the Olex2 suite.<sup>5</sup> Geometrical calculations and molecular graphics were done with Platon<sup>6</sup> and Mercury.<sup>7</sup> CCDC 2367532-2367538 contain the supplementary crystallographic data for this paper. These data can be obtained free of charge via <http://www.ccdc.cam.ac.uk/conts/retrieving.html> (or from the Cambridge Crystallographic Data Centre, 12, Union Road, Cambridge CB2 1EZ, UK; fax: +44 1223 336033).

### UV-Vis spectroscopy

UV-Vis measurements were carried out using a Varian Cary Bio 100 spectrophotometer with 1-cm quartz cuvettes. The UV-Vis spectra of  $\text{H}_2\text{SIH}$  and complexes **1t** and **1–6** were recorded in methanol and acetonitrile at room temperature immediately after solution preparation. All compounds, except complex **6**, were dissolved in methanol or acetonitrile within minutes using ultrasound. The concentrations used were  $6.0 \times 10^{-5} \text{ mol dm}^{-3}$  for  $\text{H}_2\text{SIH}$  and complexes **1–5**,  $1.5 \times 10^{-5} \text{ mol dm}^{-3}$  for complex **1t**, and below  $3 \times 10^{-5} \text{ mol dm}^{-3}$  for complex **6** due to incomplete dissolution.

**Nuclear magnetic resonance spectra** ( $^1\text{H}$ , APT, gHMQC and gHMBC NMR) were acquired on a Bruker Avance 600 NMR spectrometer using a C/H dual 5 mm probe and z-gradient accessories at 298K in  $\text{CD}_3\text{OD}$  or  $\text{CDCl}_3$  and TMS as the internal standard.

**Attenuated Total Reflectance Infrared spectra (ATR-IR)** were recorded on a Perkin Elmer Spectrum One spectrometer fitted with an ATR reluctance attachment. Spectra were collected in the  $4000\text{--}450 \text{ cm}^{-1}$  range on a diamond window.

**Differential scanning calorimetry (DSC)** method was used for getting information about the purity of hydrazone. Measurement was performed under the nitrogen stream ( $10 \text{ mL min}^{-1}$ ) on the TA Discovery DSC 25 instrument using Tzero aluminium pans and lids. The heating rate was  $10 \text{ K min}^{-1}$  in the

temperature range from 25 to 400 °C. The result was evaluated using the TA Instruments Trios (v5.1.1.46572) software.

**Thermogravimetric analyses (TGA)** were performed on a Mettler-Toledo TG/DSC 3+ Stare System thermobalance using open alumina crucibles under an oxygen atmosphere in the temperature range from 25 to 600 °C. All experiments were recorded with a heating rate of 5 °C min<sup>-1</sup> in a dynamic atmosphere with a flow rate of 10 mL min<sup>-1</sup>. The results of TGA and experiments were evaluated using the Mettler STARe software.

**Fourier Transform Infrared spectra (FTIR)** of the gaseous products evolved during thermal decomposition of the complexes were recorded with the use of the thermobalance coupled online with the Nicolet iS50 FT-IR spectrometer (Thermo Scientific) by a transfer line heated at 200 °C. FTIR spectra were recorded in the range of 4000–400 cm<sup>-1</sup> with a resolution of 4 cm<sup>-1</sup>.

#### **Catalytic investigation**

The catalytic oxidation of alcohols was monitored using gas chromatography (GC) on an Agilent 8860 chromatograph (Agilent Technologies, Santa Clara, CA, USA) equipped with a flame ionization detector (FID) and an HP-5 column (30 m × 0.320 mm × 0.25 μm). Quantification of reaction parameters was achieved through calibration curves generated from authentic standards of the reactants and products. The conversion of alcohols to their respective aldehydes was calculated relative to internal standards, including biphenyl for benzyl alcohol, acetophenone for 2-nitro and 2-chlorobenzyl alcohol, and dodecane for 2-methylbenzyl alcohol. Calibration curve correlation coefficients ( $R^2$ ) were consistently high at 0.9999, confirming the accuracy of the quantification.

## 1.1. PXRD

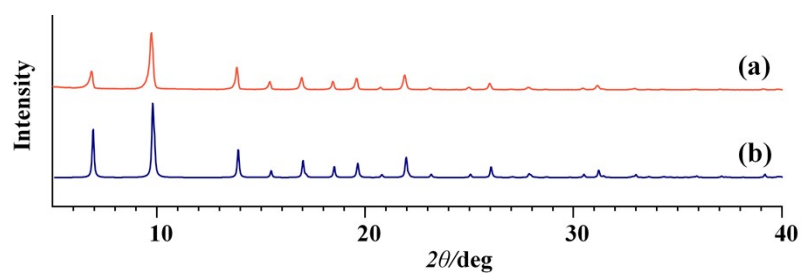

**Fig. S1** Powder X-ray diffraction patterns of (a) tetranuclear assembly  $[\text{VO}(\text{SiH})(\text{OCH}_3)]_4 \cdot 4\text{CH}_3\text{OH}$  ( $\mathbf{1t} \cdot 4\text{CH}_3\text{OH}$ ) obtained by reaction of  $\text{NH}_4\text{VO}_3$  with  $\text{H}_2\text{SiH}$  in  $\text{CH}_3\text{OH}$ ; (b)  $[\text{VO}(\text{SiH})(\text{OCH}_3)]_4 \cdot 4\text{CH}_3\text{OH}$  ( $\mathbf{1t} \cdot 4\text{CH}_3\text{OH}$ ) calculated from the X-ray single-crystal structure.

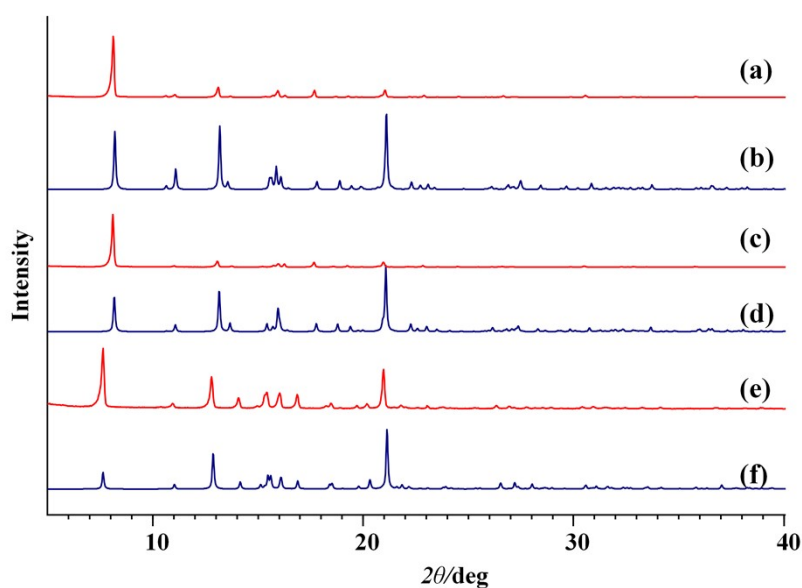

**Fig. S2** Powder X-ray diffraction patterns of polynuclear assemblies  $[\text{VO}(\text{SiH})(\text{OR})]_n$  belonging to  $\alpha$  series: (a and b)  $\text{R} = \text{OC}_2\text{H}_5$  ( $2\alpha$ ); (c and d)  $\text{R} = \text{OC}_3\text{H}_7$  ( $3\alpha$ ), (e and f)  $\text{R} = \text{OC}_4\text{H}_9$  ( $4\alpha$ ). The red lines indicate those of prepared samples, while the blue lines indicate those calculated from the X-ray single-crystal structures of the corresponding samples.

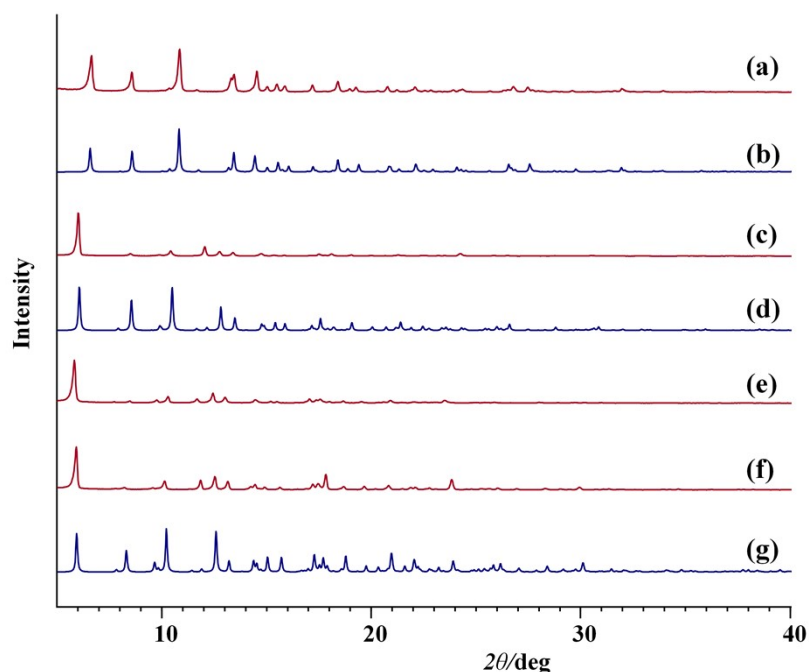

**Fig. S3** Powder X-ray diffraction patterns of polynuclear assemblies  $[\text{VO}(\text{SiH})(\text{OR})]_n$  belonging to  $\alpha$  series: (a and b)  $\text{R} = \text{OCH}_3$  ( $1\beta \cdot 0.25\text{CH}_3\text{OH}$ ); (c and d)  $\text{R} = \text{OC}_2\text{H}_5$  ( $2\beta \cdot 0.25\text{C}_2\text{H}_5\text{OH}$ ), (e)  $\text{R} = \text{OC}_4\text{H}_9$  ( $4\beta$ ); (f and g)  $\text{R} = \text{OC}_5\text{H}_{10}$  ( $5\beta$ ). The red lines indicate those of prepared samples, while the blue lines indicate those calculated from the X-ray single-crystal structures of the corresponding samples.

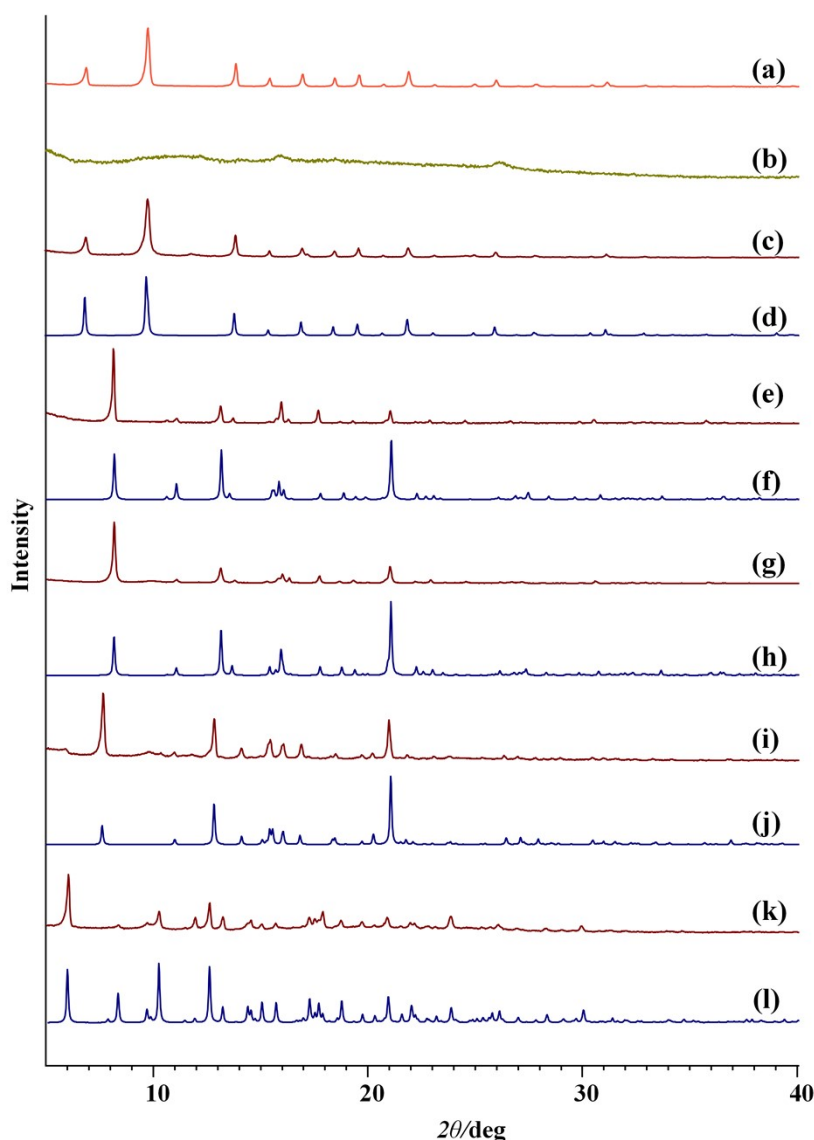

**Fig. S4** Powder X-ray diffraction patterns of

- (a)  $[\text{VO}(\text{SIH})(\text{OCH}_3)]_4 \cdot 4\text{CH}_3\text{OH}$  (**1t**·4CH<sub>3</sub>OH) obtained by reaction of  $\text{NH}_4\text{VO}_3$  with  $\text{H}_2\text{SIH}$  in  $\text{CH}_3\text{OH}$ ;
- (b) thermally activated complex  $[\text{VO}(\text{SIH})]_x$  obtained by heating of **1t**·4CH<sub>3</sub>OH for 1 hour at 165 °C;
- (c) sample obtained upon an immersion of  $[\text{VO}(\text{SIH})]_x$  in methanol for one week;
- (d)  $[\text{VO}(\text{SIH})(\text{OCH}_3)]_4 \cdot 4\text{CH}_3\text{OH}$  (**1t**·4CH<sub>3</sub>OH) calculated from the X-ray single-crystal structure;
- (e) sample obtained upon an immersion of  $[\text{VO}(\text{SIH})]_x$  in ethanol for one week;
- (f)  $[\text{VO}(\text{SIH})(\text{OC}_2\text{H}_5)]_n \cdot 0.25\text{CH}_3\text{OH}$  (**2α**) calculated from the X-ray single-crystal structure;
- (g) sample obtained upon an immersion of  $[\text{VO}(\text{SIH})]_x$  in propanol for one week;
- (h)  $[\text{VO}(\text{SIH})(\text{OC}_3\text{H}_7)]_n$  (**3α**) calculated from the X-ray single-crystal structure;
- (i) sample obtained upon an immersion of  $[\text{VO}(\text{SIH})]_x$  in butanol for one week;
- (j)  $[\text{VO}(\text{SIH})(\text{OC}_4\text{H}_9)]_n$  (**4α**) calculated from the X-ray single-crystal structure;
- (k) sample obtained upon an immersion of  $[\text{VO}(\text{SIH})]_x$  in pentanol for one week;
- (l)  $[\text{VO}(\text{SIH})(\text{OC}_4\text{H}_9)]_n$  (**5β**) calculated from the X-ray single-crystal structure;

## 1.2. SCXRD

**Table S1** Experimental and crystallographic data for  $\alpha$  polymorphs of [VO(OR)(SIH)] polymers

| Identifier                           | <b>2<math>\alpha</math></b>                                     | <b>3<math>\alpha</math></b>                                     | <b>4<math>\alpha</math></b>                                     |
|--------------------------------------|-----------------------------------------------------------------|-----------------------------------------------------------------|-----------------------------------------------------------------|
| Empirical formula                    | C <sub>15</sub> H <sub>14</sub> N <sub>3</sub> O <sub>4</sub> V | C <sub>16</sub> H <sub>16</sub> N <sub>3</sub> O <sub>4</sub> V | C <sub>17</sub> H <sub>18</sub> N <sub>3</sub> O <sub>4</sub> V |
| $M_r$                                | 351.23                                                          | 365.26                                                          | 379.28                                                          |
| $T/K$                                | 169.99(10)                                                      | 169.99(10)                                                      | 169.99(10)                                                      |
| Crystal system                       | orthorhombic, dark red irregular                                | orthorhombic, brown plate                                       | orthorhombic, orange irregular                                  |
| Space group                          | <i>P b c a</i>                                                  | <i>P b c a</i>                                                  | <i>P b c a</i>                                                  |
| $a/\text{\AA}$                       | 13.05222(6)                                                     | 12.9499(3)                                                      | 12.5068(2)                                                      |
| $b/\text{\AA}$                       | 11.39032(5)                                                     | 11.4867(3)                                                      | 11.70940(10)                                                    |
| $c/\text{\AA}$                       | 21.55450(11)                                                    | 21.6234(5)                                                      | 23.1275(3)                                                      |
| $\alpha/^\circ$                      | 90                                                              | 90                                                              | 90                                                              |
| $\beta/^\circ$                       | 90                                                              | 90                                                              | 90                                                              |
| $\gamma/^\circ$                      | 90                                                              | 90                                                              | 90                                                              |
| $V/\text{\AA}^3$                     | 3204.49(2)                                                      | 3216.52(13)                                                     | 3386.96(8)                                                      |
| $Z$                                  | 8                                                               | 8                                                               | 8                                                               |
| $\rho_{\text{cal}}/\text{g cm}^{-3}$ | 1.456                                                           | 1.509                                                           | 1.488                                                           |
| $\mu/\text{mm}^{-1}$                 | 5.391                                                           | 5.393                                                           | 5.143                                                           |

|                                                     |                                                                        |                                                                       |                                                                        |
|-----------------------------------------------------|------------------------------------------------------------------------|-----------------------------------------------------------------------|------------------------------------------------------------------------|
| $F(000)$                                            | 1440                                                                   | 1504                                                                  | 1568                                                                   |
| Crystal size/mm <sup>3</sup>                        | 0.665×0.14×0.11                                                        | 0.26×0.05×0.02                                                        | 0.195×0.078×0.042                                                      |
| Radiation                                           | CuK $\alpha$ ( $\lambda = 1.54184\text{\AA}$ )                         | CuK $\alpha$ ( $\lambda = 1.54184\text{\AA}$ )                        | CuK $\alpha$ ( $\lambda = 1.54184\text{\AA}$ )                         |
| $2\Theta$ range/ $^\circ$                           | 8.204 to 155.53                                                        | 8.178 to 155.356                                                      | 7.646 to 155.626                                                       |
| Index ranges                                        | $-16 \leq h \leq 16,$<br>$-14 \leq k \leq 14,$<br>$-23 \leq l \leq 27$ | $-8 \leq h \leq 16,$<br>$-14 \leq k \leq 14,$<br>$-26 \leq l \leq 27$ | $-15 \leq h \leq 14,$<br>$-14 \leq k \leq 14,$<br>$-29 \leq l \leq 29$ |
| Reflections collected                               | 127302                                                                 | 16891                                                                 | 24059                                                                  |
| Independent reflections                             | 3412 [ $R_{\text{int}} = 1.44\%$ , $R_{\text{sigma}} = 5.88\%$ ]       | 3389 [ $R_{\text{int}} = 3.33\%$ , $R_{\text{sigma}} = 3.87\%$ ]      | 3604 [ $R_{\text{int}} = 2.82\%$ , $R_{\text{sigma}} = 3.79\%$ ]       |
| Data/restraints/parameters                          | 3412/-/210                                                             | 3389/-/218                                                            | 3604/-/227                                                             |
| $g_1, g_2$ in $w^a$                                 | 0.0437, 1.5078                                                         | 0.0479, 2.2125                                                        | 0.0704, 3.7488                                                         |
| Goodness-of-fit on $F^2, S^b$                       | 1.096                                                                  | 1.068                                                                 | 1.077                                                                  |
| Final $R$ and $wR^c$ values [ $I \geq 2\sigma(I)$ ] | $R_1 = 2.87\%$ , $wR_2 = 8.17\%$                                       | $R_1 = 3.77\%$ , $wR_2 = 9.95\%$                                      | $R_1 = 4.76\%$ , $wR_2 = 12.93\%$                                      |
| Final $R$ and $wR^c$ values [all data]              | $R_1 = 2.89\%$ , $wR_2 = 8.2\%$                                        | $R_1 = 4.2\%$ , $wR_2 = 10.24\%$                                      | $R_1 = 5.13\%$ , $wR_2 = 13.3\%$                                       |
| Largest diff. peak/hole / $e \text{\AA}^{-3}$       | 0.545/-0.339                                                           | 0.620/-0.372                                                          | 1.317/-0.558                                                           |

<sup>a</sup> $w = 1/[\sigma F_o^2 + (g_1 P)^2 + g_2 P]$  where  $P = (F_o^2 + 2F_c^2)/3$

<sup>b</sup> $S = \{\Sigma[w(F_o^2 - F_c^2)2]/(N_r - N_p)\}^{1/2}$  where  $N_r$  = number of independent reflections,  $N_p$  = number of refined parameters.

<sup>c</sup> $R = \Sigma||F_o| - |F_c|/\Sigma|F_o|$ ;  $wR = \{\Sigma[w(F_o^2 - F_c^2)2]/\Sigma[w(F_o^2)2]\}^{1/2}$



**Table S2** Experimental and crystallographic data for  $\beta$  polymorphs of [VO(OR)(SIH)] polymers and **1t**·4CH<sub>3</sub>OH tetramer

| Identifier                            | <b>1<math>\beta</math></b> ·0.25CH <sub>3</sub> OH                             | <b>1t</b> ·4CH <sub>3</sub> OH                                  | <b>2<math>\beta</math></b> ·0.25C <sub>2</sub> H <sub>5</sub> OH                   | <b>5<math>\beta</math></b>                                                         |
|---------------------------------------|--------------------------------------------------------------------------------|-----------------------------------------------------------------|------------------------------------------------------------------------------------|------------------------------------------------------------------------------------|
| Empirical formula                     | C <sub>57</sub> H <sub>52</sub> N <sub>12</sub> O <sub>17</sub> V <sub>4</sub> | C <sub>15</sub> H <sub>16</sub> N <sub>3</sub> O <sub>5</sub> V | C <sub>31·34</sub> H <sub>26</sub> N <sub>6</sub> O <sub>8·50</sub> V <sub>2</sub> | C <sub>35·67</sub> H <sub>28·50</sub> N <sub>6</sub> O <sub>8</sub> V <sub>2</sub> |
| $M_r$                                 | 690.43                                                                         | 369.25                                                          | 724.60                                                                             | 771.03                                                                             |
| $T/K$                                 | 169.98(10)                                                                     | 170(2)                                                          | 293(2)                                                                             | 170(2)                                                                             |
| Crystal system                        | orthorhombic, brown plate                                                      | tetragonal, yellow block                                        | orthorhombic, brown plate                                                          | orthorhombic, brown block                                                          |
| Space group                           | <i>I b c a</i>                                                                 | <i>I</i> -4                                                     | <i>I b c a</i>                                                                     | <i>I b c a</i>                                                                     |
| $a/\text{\AA}$                        | 22.0687(2)                                                                     | 18.1755(4)                                                      | 20.6605(9)                                                                         | 21.2703(3)                                                                         |
| $b/\text{\AA}$                        | 20.5886(2)                                                                     | 18.1755(4)                                                      | 22.3137(8)                                                                         | 29.7362(4)                                                                         |
| $c/\text{\AA}$                        | 26.8420(3)                                                                     | 10.3739(4)                                                      | 29.1125(15)                                                                        | 22.5536(4)                                                                         |
| $\alpha/^\circ$                       | 90                                                                             | 90                                                              | 90                                                                                 | 90                                                                                 |
| $\beta/^\circ$                        | 90                                                                             | 90                                                              | 90                                                                                 | 90                                                                                 |
| $\gamma/^\circ$                       | 90                                                                             | 90                                                              | 90                                                                                 | 90                                                                                 |
| $V/\text{\AA}^3$                      | 12196.0(2)                                                                     | 3427.0(2)                                                       | 13421.2(10)                                                                        | 14265.1(4)                                                                         |
| $Z$                                   | 16                                                                             | 8                                                               | 16                                                                                 | 16                                                                                 |
| $\rho_{\text{calc}}/\text{g cm}^{-3}$ | 1.504                                                                          | 1.431                                                           | 1.434                                                                              | 1.436                                                                              |
| $\mu/\text{mm}^{-1}$                  | 5.668                                                                          | 5.112                                                           | 5.181                                                                              | 4.901                                                                              |
| $F(000)$                              | 5648                                                                           | 1520                                                            | 5921                                                                               | 6312                                                                               |
| Crystal size/mm <sup>3</sup>          | 0.227×0.19×0.051                                                               | 0.09×0.06×0.05                                                  | 0.32×0.02×0.02                                                                     | 0.05×0.03×0.02                                                                     |
| Radiation                             | CuK $\alpha$ ( $\lambda = 1.54184\text{\AA}$ )                                 | CuK $\alpha$ ( $\lambda = 1.54184\text{\AA}$ )                  | CuK $\alpha$ ( $\lambda = 1.54184\text{\AA}$ )                                     | CuK $\alpha$ ( $\lambda = 1.54184\text{\AA}$ )                                     |

|                                                     |                                                                          |                                                                          |                                                                          |                                                                          |
|-----------------------------------------------------|--------------------------------------------------------------------------|--------------------------------------------------------------------------|--------------------------------------------------------------------------|--------------------------------------------------------------------------|
| 2 $\Theta$ range/ $^{\circ}$                        | 8.012 to 155.45                                                          | 9.818 to 155.094                                                         | 7.924 to 154.864                                                         | 8.246 to 155.516                                                         |
| Index ranges                                        | $-24 \leq h \leq 27$ ,<br>$-19 \leq k \leq 26$ ,<br>$-33 \leq l \leq 34$ | $-22 \leq h \leq 22$ ,<br>$-19 \leq k \leq 23$ ,<br>$-13 \leq l \leq 13$ | $-24 \leq h \leq 26$ ,<br>$-28 \leq k \leq 26$ ,<br>$-35 \leq l \leq 35$ | $-26 \leq h \leq 20$ ,<br>$-37 \leq k \leq 37$ ,<br>$-28 \leq l \leq 28$ |
| Reflections collected                               | 34430                                                                    | 17514                                                                    | 86108                                                                    | 33047                                                                    |
| Independent reflections                             | 6412 [ $R_{\text{int}} = 2.55\%$ , $R_{\text{sigma}} = 3.15\%$ ]         | 3558 [ $R_{\text{int}} = 4.21\%$ , $R_{\text{sigma}} = 5.22\%$ ]         | 6996 [ $R_{\text{int}} = 4.66\%$ , $R_{\text{sigma}} = 12.28\%$ ]        | 7431 [ $R_{\text{int}} = 4.93\%$ , $R_{\text{sigma}} = 8.63\%$ ]         |
| Data/restraints/parameters                          | 6412/-/409                                                               | 3558/-/200                                                               | 6996/-/428                                                               | 7431/-/494                                                               |
| $g_1, g_2$ in $w^a$                                 | 0.0547, 11.9058                                                          | 0.0506, 1.9758                                                           | 0.0868, 7.4950                                                           | 0.1305, 16.8622                                                          |
| Goodness-of-fit on $F^2, S^b$                       | 1.092                                                                    | 1.074                                                                    | 1.023                                                                    | 1.050                                                                    |
| Final $R$ and $wR^c$ values [ $I \geq 2\sigma(I)$ ] | $R_1 = 3.52\%$ , $wR_2 = 9.99\%$                                         | $R_1 = 3.81\%$ , $wR_2 = 9.87\%$                                         | $R_1 = 5.77\%$ , $wR_2 = 14.71\%$                                        | $R_1 = 6.78\%$ , $wR_2 = 19.09\%$                                        |
| Final $R$ and $wR^c$ values [all data]              | $R_1 = 3.77\%$ , $wR_2 = 10.18\%$                                        | $R_1 = 4.18\%$ , $wR_2 = 10.28\%$                                        | $R_1 = 9.49\%$ , $wR_2 = 16.96\%$                                        | $R_1 = 8.88\%$ , $wR_2 = 20.74\%$                                        |
| Largest diff. peak/hole / e $\text{\AA}^{-3}$       | 0.348/-0.474                                                             | 0.160/-0.291                                                             | 0.581/-0.413                                                             | 0.916/-0.781                                                             |
| Flack parameter                                     | -                                                                        | 0.005(4)                                                                 | -                                                                        | -                                                                        |

<sup>a</sup> $w = 1/[\sigma F_o^2 + (g_1 P)^2 + g_2 P]$  where  $P = (F_o^2 + 2F_c^2)/3$

<sup>b</sup> $S = \{\Sigma[w(F_o^2 - F_c^2)2]/(N_r - N_p)\}^{1/2}$  where  $N_r$  = number of independent reflections,  $N_p$  = number of refined parameters.

<sup>c</sup> $R = \Sigma||F_o| - |F_c|/\Sigma|F_o|$ ;  $wR = \{\Sigma[w(F_o^2 - F_c^2)2]/\Sigma[w(F_o^2)2]\}^{1/2}$

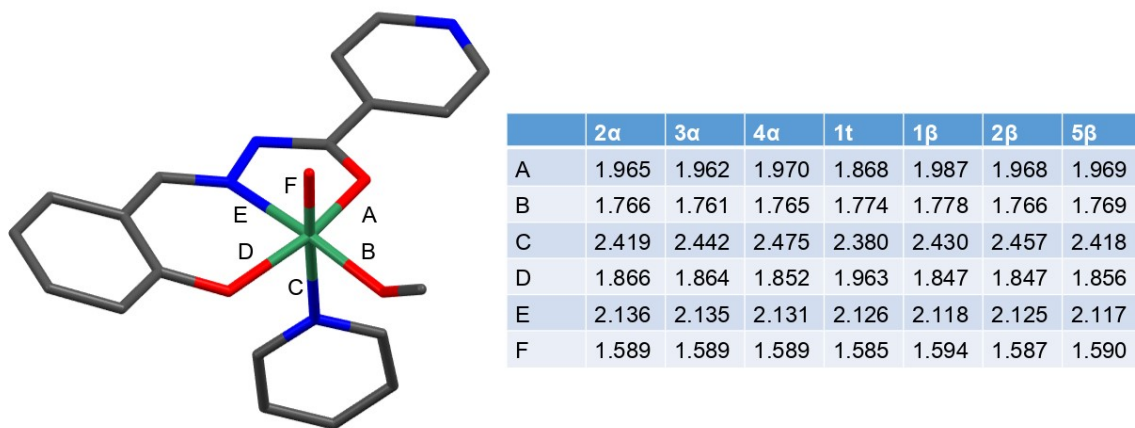

**Fig. S5** Bond lengths in the coordination environment of the vanadium ion. Bond length standard deviations are omitted for clarity, and can be found in respective CIF files.

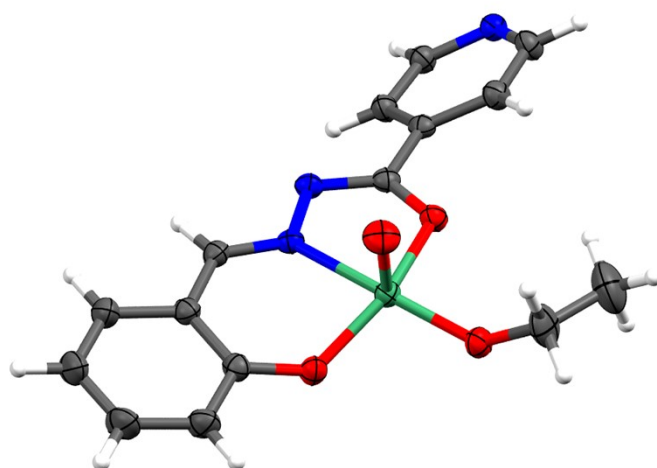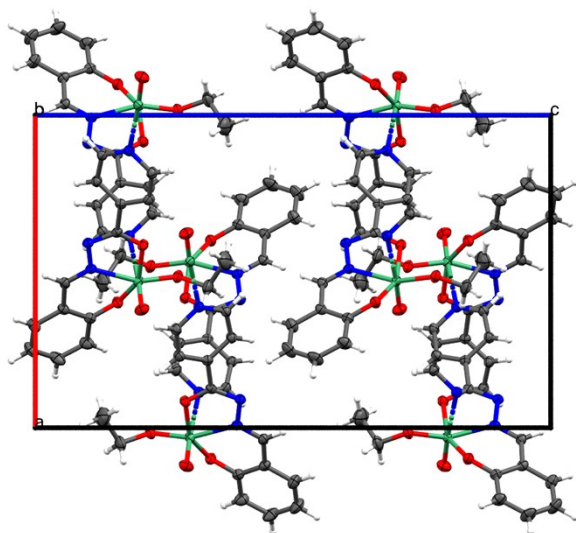

(a)  $2\alpha$

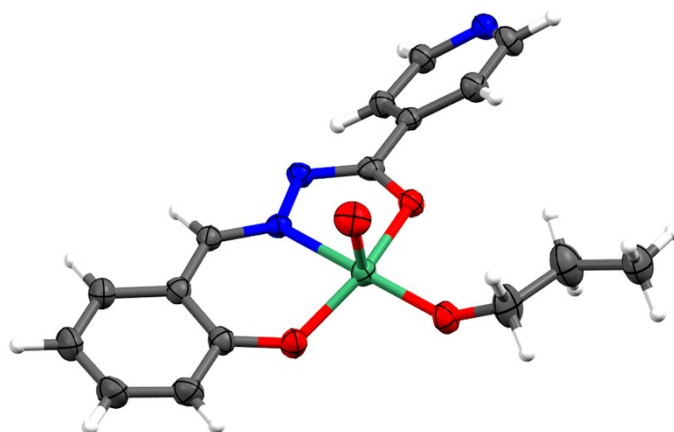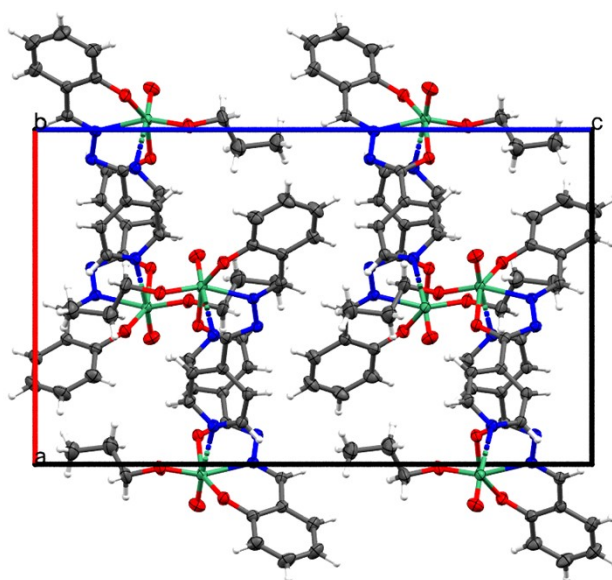

(b) 3a

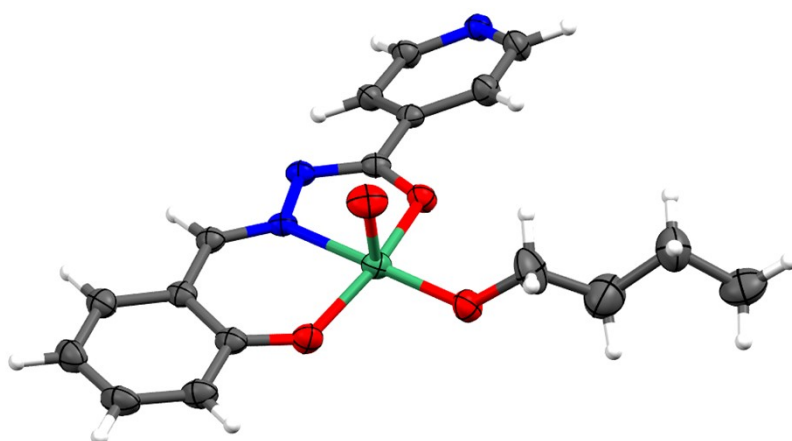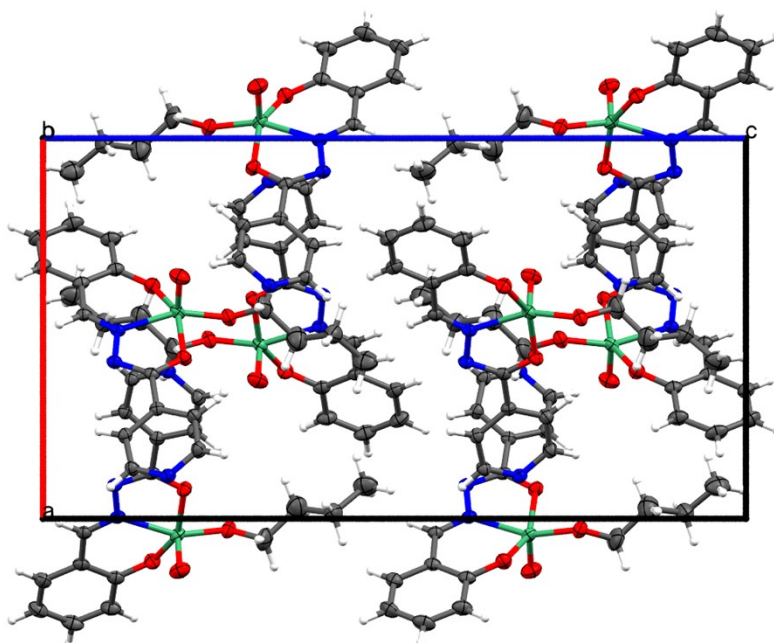

(c) **4a**

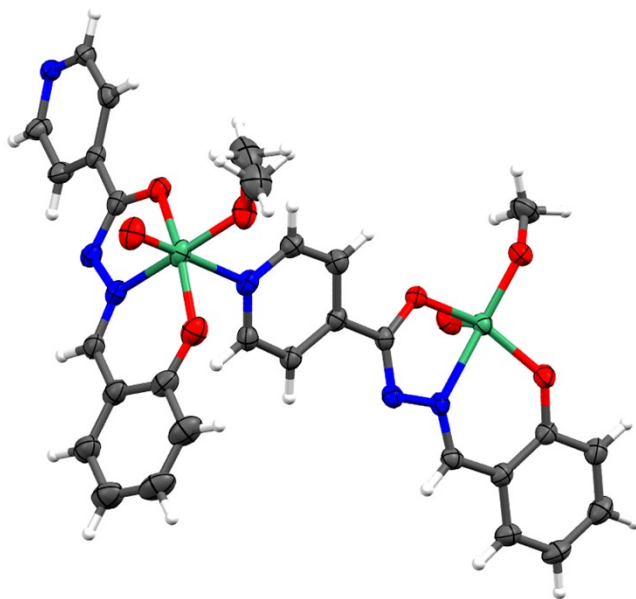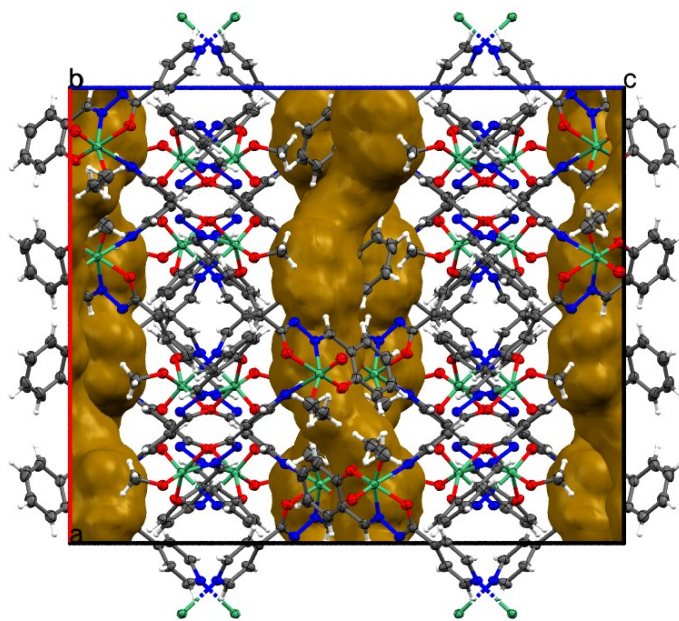

(d) 1 $\beta$

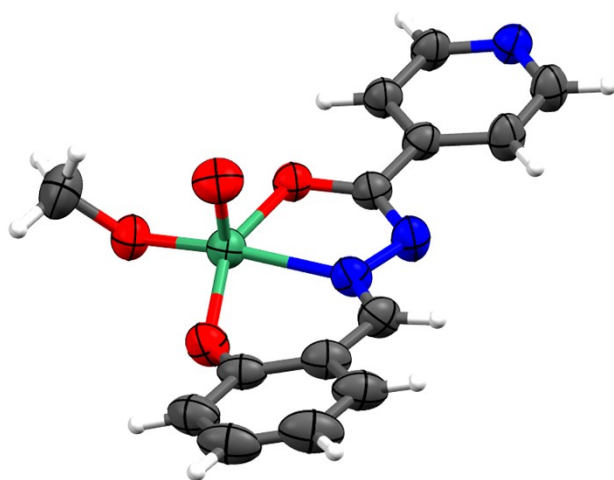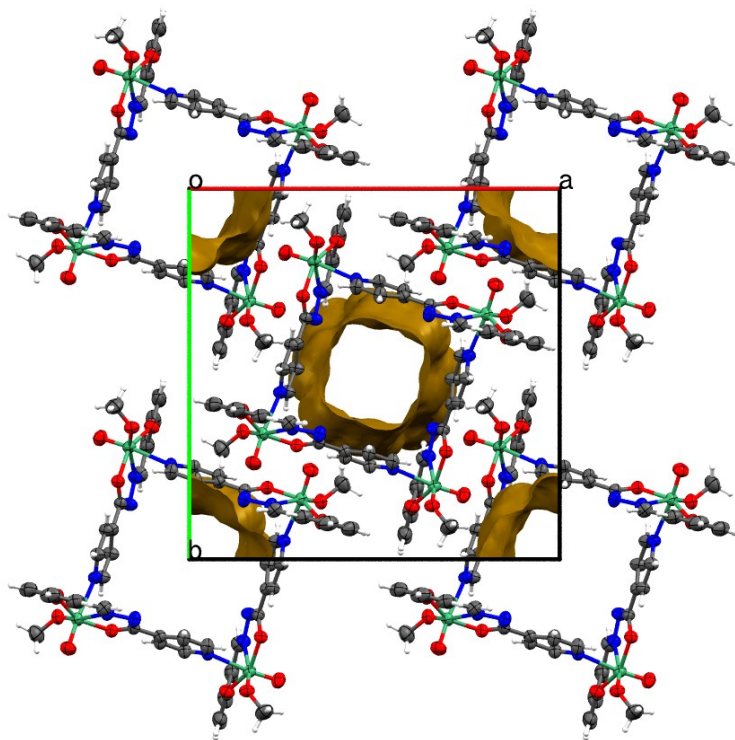

(e) 1t



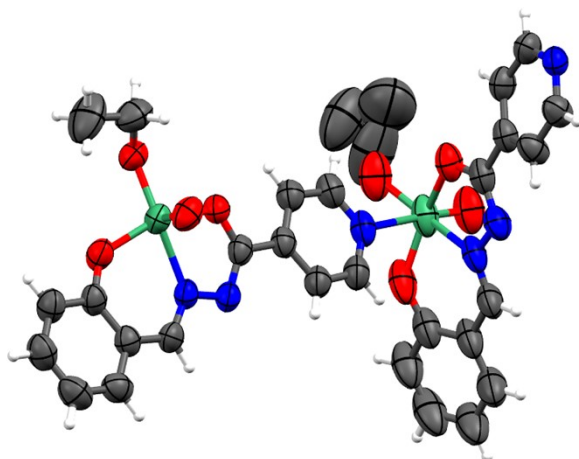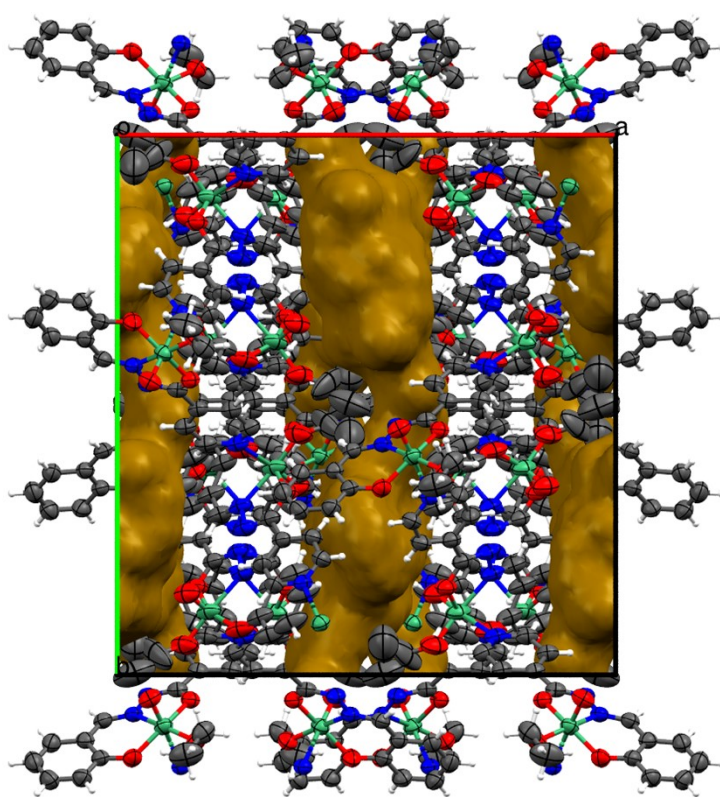

(f)  $2\beta$

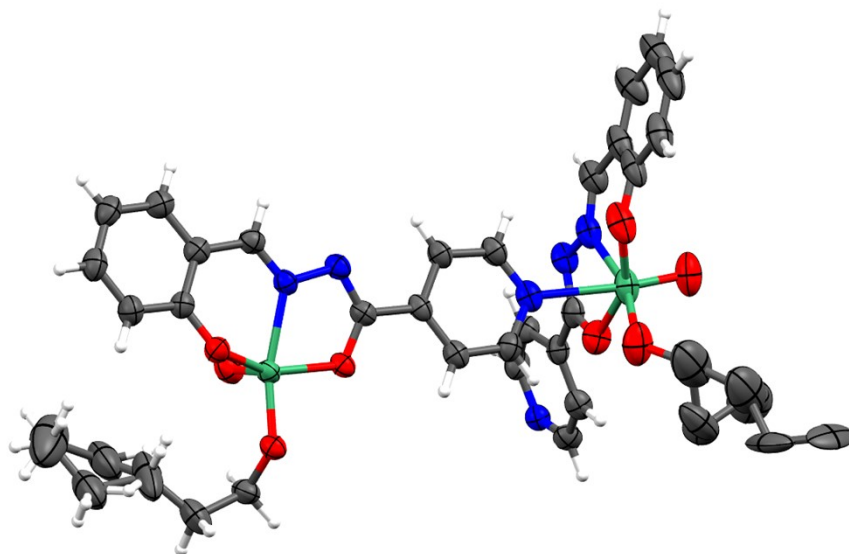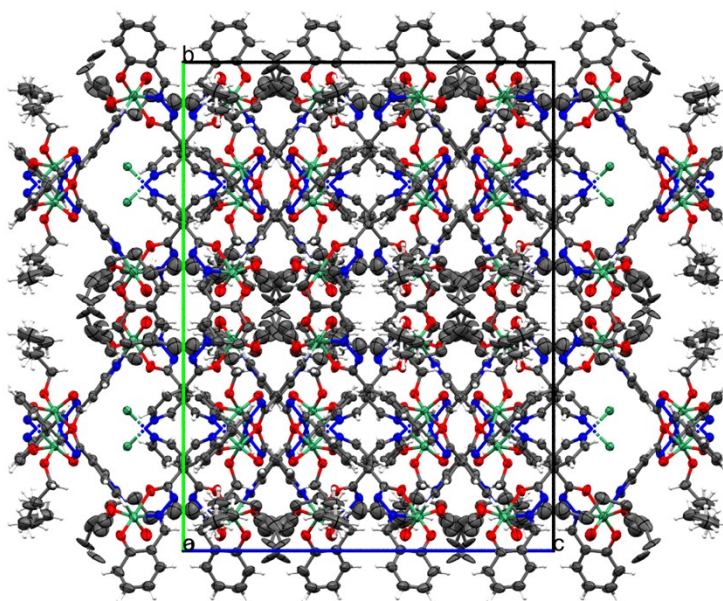

(g)  $5\beta$

**Fig. S6** Asymmetric unit (top) and packing of molecules/polymers (bottom) for compounds characterized in this work. Atoms are shown as thermal ellipsoids at 50% probability level. Where applicable, void space is enclosed in yellow surface.

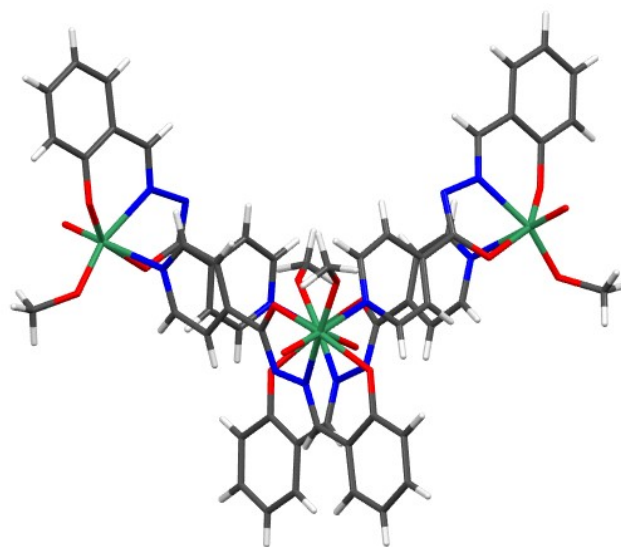

**Fig. S7** Folded-square shape of tetranuclear complex **1t** (side view).

### 1.3. UV-Vis

**Table S3** UV-Vis spectral data of H<sub>2</sub>SIH and its complexes in methanol and acetonitrile.

| Compound                                                  | Solvent            | $\lambda_{\max}/\text{nm}$ ( $\epsilon/\text{dm}^3 \text{ mol}^{-1} \text{ cm}^{-1}$ )                                                            |
|-----------------------------------------------------------|--------------------|---------------------------------------------------------------------------------------------------------------------------------------------------|
| H <sub>2</sub> SIH                                        | CH <sub>3</sub> OH | 214 (1.88·10 <sup>4</sup> ), ~238 <sup>a</sup> , ~279 <sup>a</sup> , 288 (1.36·10 <sup>4</sup> ), ~299 <sup>a</sup> , 333 (1.17·10 <sup>4</sup> ) |
|                                                           | CH <sub>3</sub> CN | 232 (1.06·10 <sup>4</sup> ), ~277 <sup>a</sup> , 286 (1.69·10 <sup>4</sup> ), 297 (1.52·10 <sup>4</sup> ), 329 (1.24·10 <sup>4</sup> )            |
| [VO(SIH)(OCH <sub>3</sub> ) <sub>4</sub> ]                | CH <sub>3</sub> OH | 230 (1.04·10 <sup>5</sup> ), ~275 <sup>a</sup> , 322 (6.95·10 <sup>4</sup> ), 404 (1.76·10 <sup>4</sup> )                                         |
|                                                           | CH <sub>3</sub> CN | 231 (7.37·10 <sup>4</sup> ), 271 (5.47·10 <sup>4</sup> ), 323 (4.27·10 <sup>4</sup> ), ~340 <sup>a</sup> , 403 (2.25·10 <sup>4</sup> )            |
| [VO(SIH)(OCH <sub>3</sub> ) <sub>n</sub> ]                | CH <sub>3</sub> OH | 231 (3.18·10 <sup>4</sup> ), ~275 <sup>a</sup> , 322 (2.09·10 <sup>4</sup> ), 404 (5.78·10 <sup>3</sup> )                                         |
|                                                           | CH <sub>3</sub> CN | 231 (2.02·10 <sup>4</sup> ), 267 (1.66·10 <sup>4</sup> ), 320 (1.29·10 <sup>4</sup> ), 390 (5.25·10 <sup>3</sup> )                                |
| [VO(SIH)(OC <sub>2</sub> H <sub>5</sub> ) <sub>n</sub> ]  | CH <sub>3</sub> OH | 232 (2.68·10 <sup>4</sup> ), ~275 <sup>a</sup> , 322 (1.82·10 <sup>4</sup> ), 404 (4.46·10 <sup>3</sup> )                                         |
|                                                           | CH <sub>3</sub> CN | 231 (1.27·10 <sup>4</sup> ), 267 (1.00·10 <sup>4</sup> ), 320 (7.89·10 <sup>3</sup> ), 390 (3.34·10 <sup>3</sup> )                                |
| [VO(SIH)(OC <sub>3</sub> H <sub>7</sub> ) <sub>n</sub> ]  | CH <sub>3</sub> OH | 231 (2.78·10 <sup>4</sup> ), ~275 <sup>a</sup> , 321 (1.88·10 <sup>4</sup> ), 404 (4.67·10 <sup>3</sup> )                                         |
|                                                           | CH <sub>3</sub> CN | 231 (1.88·10 <sup>4</sup> ), 267 (1.54·10 <sup>4</sup> ), 320 (1.20·10 <sup>4</sup> ), 390 (4.89·10 <sup>3</sup> )                                |
| [VO(SIH)(OC <sub>4</sub> H <sub>9</sub> ) <sub>n</sub> ]  | CH <sub>3</sub> OH | 231 (2.88·10 <sup>4</sup> ), ~275 <sup>a</sup> , 322 (1.95·10 <sup>4</sup> ), 404 (4.80·10 <sup>3</sup> )                                         |
|                                                           | CH <sub>3</sub> CN | 231 (2.13·10 <sup>4</sup> ), 267 (1.74·10 <sup>4</sup> ), 320 (1.36·10 <sup>4</sup> ), 390 (5.59·10 <sup>3</sup> )                                |
| [VO(SIH)(OC <sub>5</sub> H <sub>11</sub> ) <sub>n</sub> ] | CH <sub>3</sub> OH | 231 (2.54·10 <sup>4</sup> ), ~275 <sup>a</sup> , 322 (1.71·10 <sup>4</sup> ), 404 (4.27·10 <sup>3</sup> )                                         |
|                                                           | CH <sub>3</sub> CN | 231 (2.50·10 <sup>4</sup> ), 267 (2.05·10 <sup>4</sup> ), 320 (1.60·10 <sup>4</sup> ), 390 (6.59·10 <sup>3</sup> )                                |
| [VO <sub>2</sub> (HSIH)] <sup>b</sup>                     | CH <sub>3</sub> OH | 229, ~275 <sup>a</sup> , 322, 401                                                                                                                 |
|                                                           | CH <sub>3</sub> CN | 232, ~275 <sup>a</sup> , 323, ~338 <sup>a</sup> , 405                                                                                             |

<sup>a</sup> Shoulder.

<sup>b</sup> Due to incomplete dissolution of the compound,  $\epsilon$  values remained undetermined.

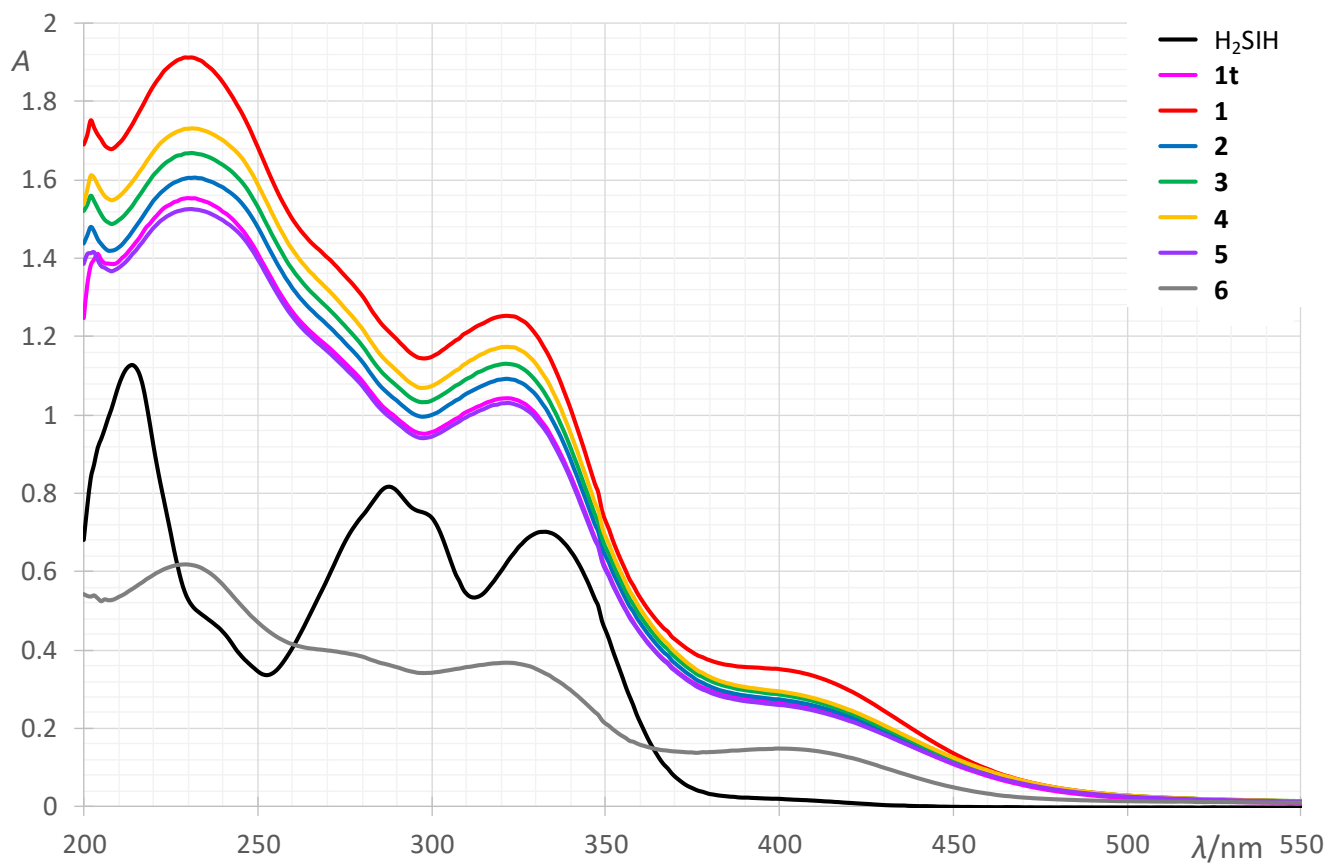

**Fig. S8** The UV-Vis spectra of  $\text{H}_2\text{SIH}$  and its complexes in methanol. The concentrations were  $6.0 \times 10^{-5} \text{ mol dm}^{-3}$  for  $\text{H}_2\text{SIH}$  and  $[\text{VO}(\text{SIH})(\text{OR})_n]$  complexes (**1–5**),  $1.5 \times 10^{-5} \text{ mol dm}^{-3}$  for  $[\text{VO}(\text{SIH})(\text{OCH}_3)_4]$  (**1t**), and below  $3 \times 10^{-5} \text{ mol dm}^{-3}$  for  $[\text{VO}_2(\text{HSIH})]$  (**6**).

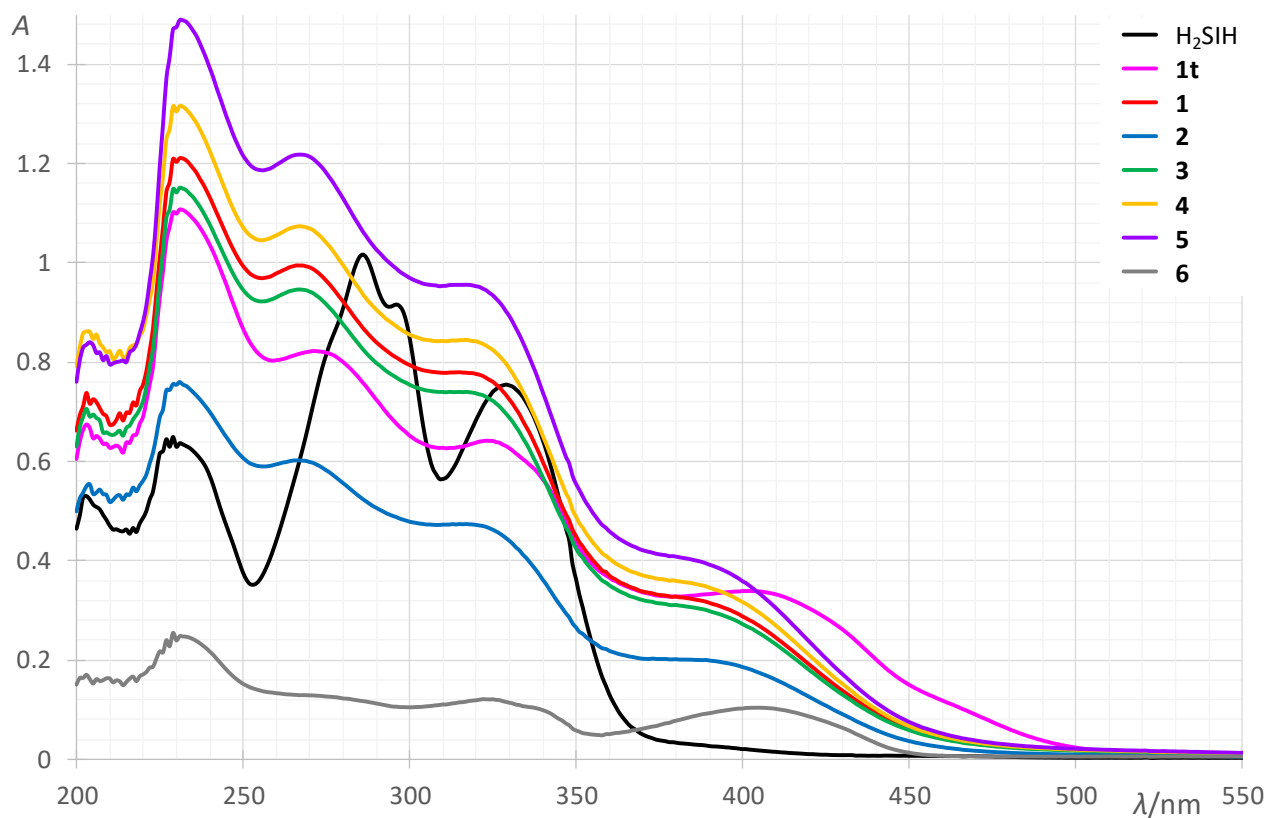

**Fig. S9** The UV-Vis spectra of  $\text{H}_2\text{SIH}$  and its complexes in acetonitrile. The concentrations were  $6.0 \times 10^{-5} \text{ mol dm}^{-3}$  for  $\text{H}_2\text{SIH}$  and  $[\text{VO}(\text{SIH})(\text{OR})_n]$  complexes (**1–5**),  $1.5 \times 10^{-5} \text{ mol dm}^{-3}$  for  $[\text{VO}(\text{SIH})(\text{OCH}_3)_4]$  (**1t**), and below  $3 \times 10^{-5} \text{ mol dm}^{-3}$  for  $[\text{VO}_2(\text{HSIH})]$  (**6**).

## 1.4. NMR spectroscopy

**Table S4**  $^1\text{H}$  and  $^{13}\text{C}$  chemical shifts (ppm) of  $\text{H}_2\text{SIH}$  and  $[\text{VO}(\text{SIH})(\text{OC}_3\text{H}_7)]$

| Atom      | $\text{H}_2\text{SIH}$             |                                       | $[\text{VO}(\text{SIH})(\text{OC}_3\text{H}_7)]$ |                                       |
|-----------|------------------------------------|---------------------------------------|--------------------------------------------------|---------------------------------------|
|           | $\delta$ / ppm<br>( $^1\text{H}$ ) | $\delta$ / ppm<br>( $^{13}\text{C}$ ) | $\delta$ / ppm<br>( $^1\text{H}$ )               | $\delta$ / ppm<br>( $^{13}\text{C}$ ) |
| <b>1</b>  | 8.56                               | 151.41                                | 8.84                                             | 154.41                                |
| <b>4</b>  | –                                  | 162.51                                | –                                                | 169.32                                |
| <b>5</b>  | –                                  | 140.92                                | –                                                | 139.94                                |
| <b>6</b>  | 7.90                               | 121.76                                | 8.07                                             | 122.41                                |
| <b>7</b>  | 8.76                               | 149.75                                | 8.68                                             | 149.27                                |
| <b>8</b>  | –                                  | –                                     | –                                                | –                                     |
| <b>9</b>  | 8.76                               | 149.75                                | 8.68                                             | 149.27                                |
| <b>10</b> | 7.90                               | 121.76                                | 8.07                                             | 122.41                                |
| <b>11</b> | –                                  | 117.99                                | –                                                | 120.18                                |
| <b>12</b> | –                                  | 158.21                                | –                                                | 164.20                                |
| <b>13</b> | 6.95                               | 116.34                                | 7.04                                             | 116.45                                |
| <b>14</b> | 7.33                               | 131.83                                | 7.55                                             | 134.52                                |
| <b>15</b> | 6.94                               | 119.24                                | 6.96                                             | 102.14                                |
| <b>16</b> | 7.48                               | 130.33                                | 7.65                                             | 132.60                                |

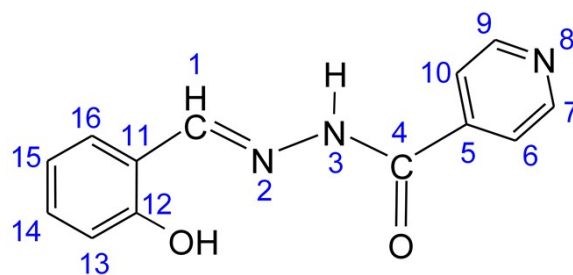

**Scheme S1** The structural formula of  $\text{H}_2\text{SIH}$  with the NMR numbering scheme.

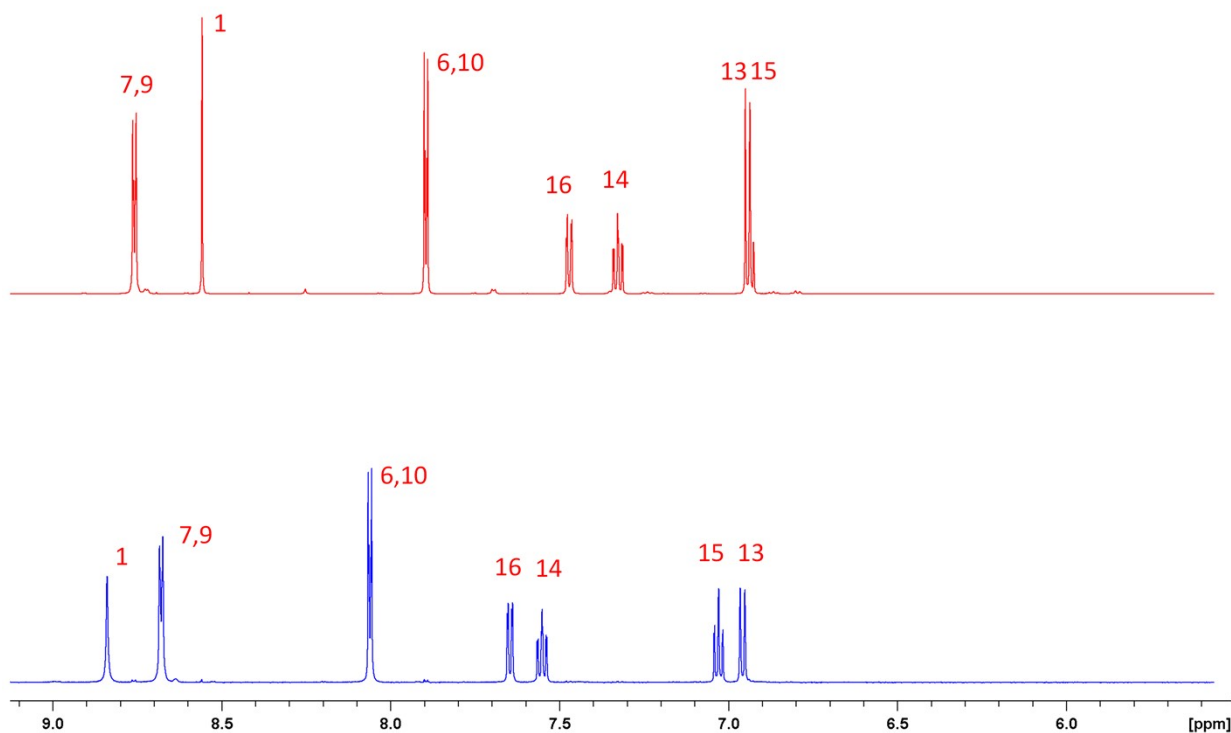

(a)

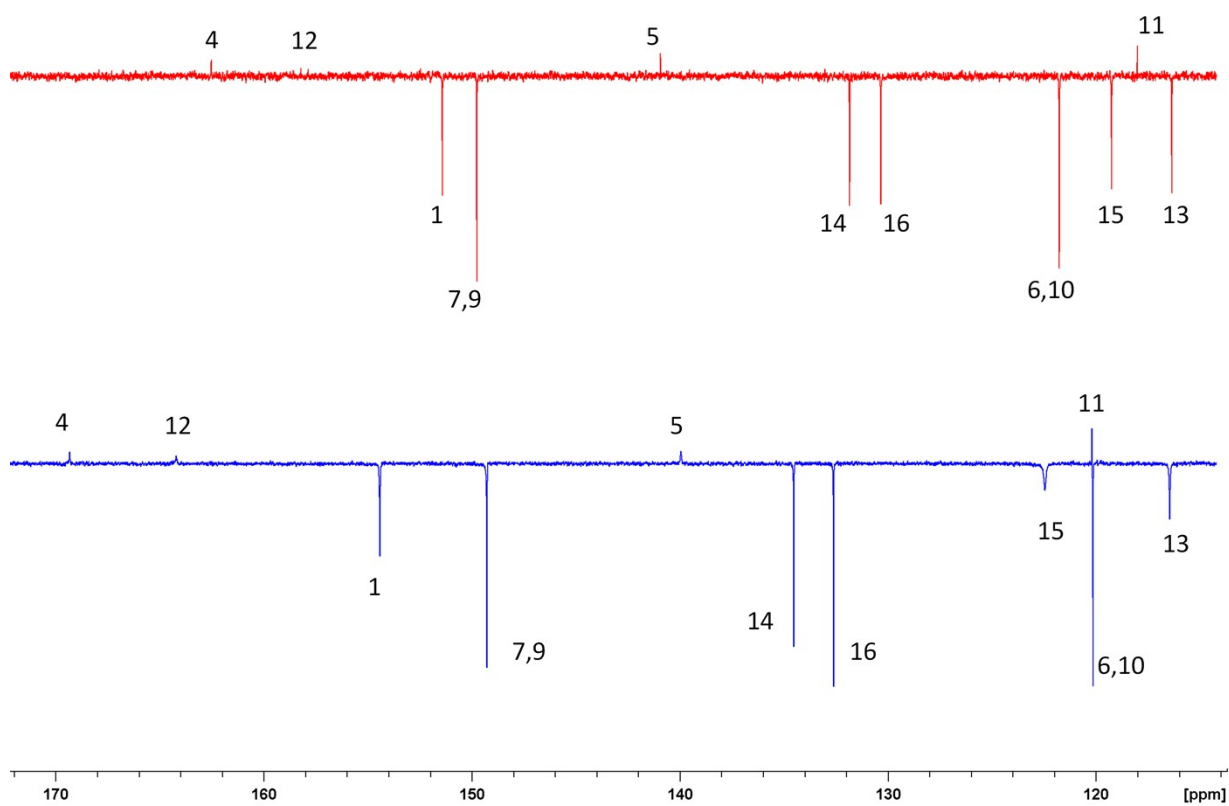

(b)

**Fig. S10** A portion of the (a)  $^1\text{H}$  NMR and (b)  $^{13}\text{C}$  NMR spectra in  $\text{CD}_3\text{OD}$  of  $\text{H}_2\text{SIH}$  (red line),  $[\text{VO}(\text{SIH})(\text{OC}_3\text{H}_7)]$  (blue line).



## 1.5. ATR-IR spectroscopy

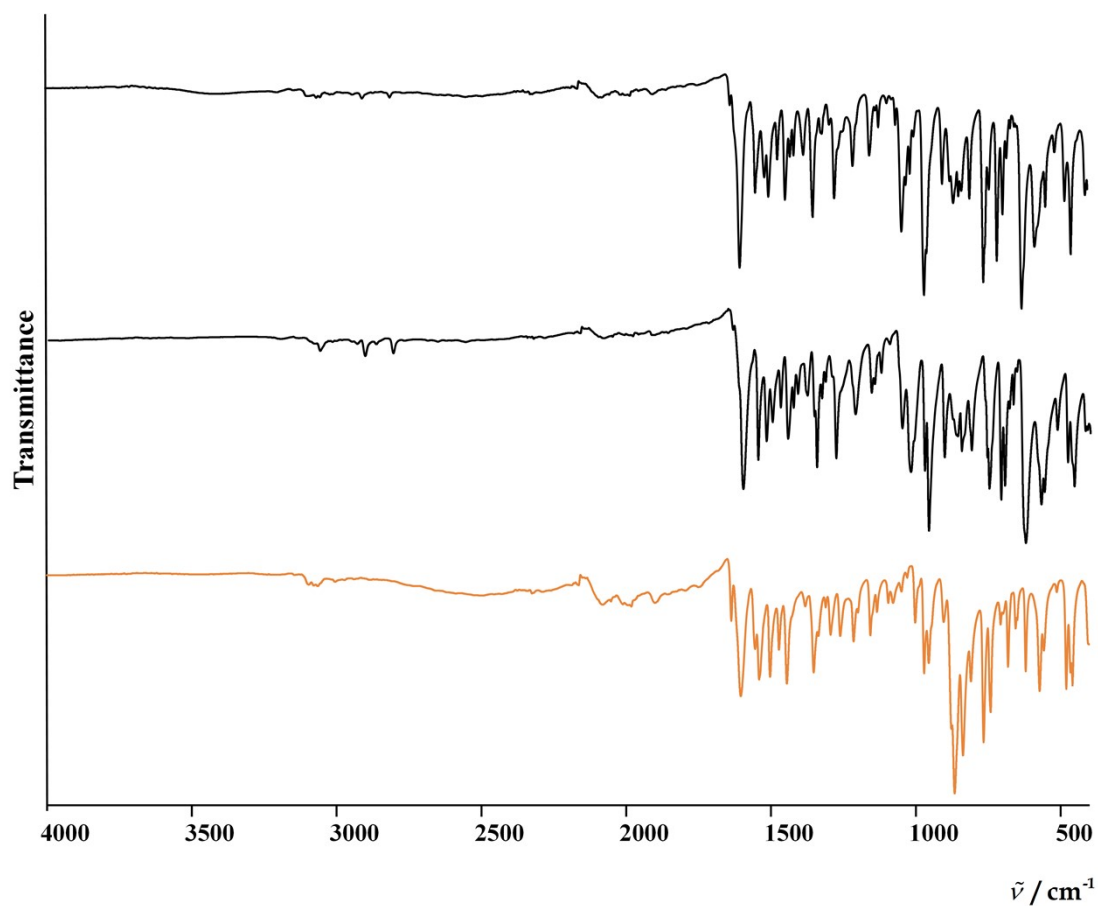

**Fig. S11** IR-ATR spectra of  $[\text{VO}(\text{SiH})(\text{OCH}_3)]_4 \cdot 4\text{CH}_3\text{OH}$  (for **1t**·4 $\text{CH}_3\text{OH}$ ),  $[\text{VO}(\text{SiH})(\text{OCH}_3)]_n \cdot 0.25\text{MeOH}$  (**1**·0.25 $\text{CH}_3\text{OH}$ ) and  $[\text{VO}_2(\text{HSiH})]$  (**6**) (from top to bottom).

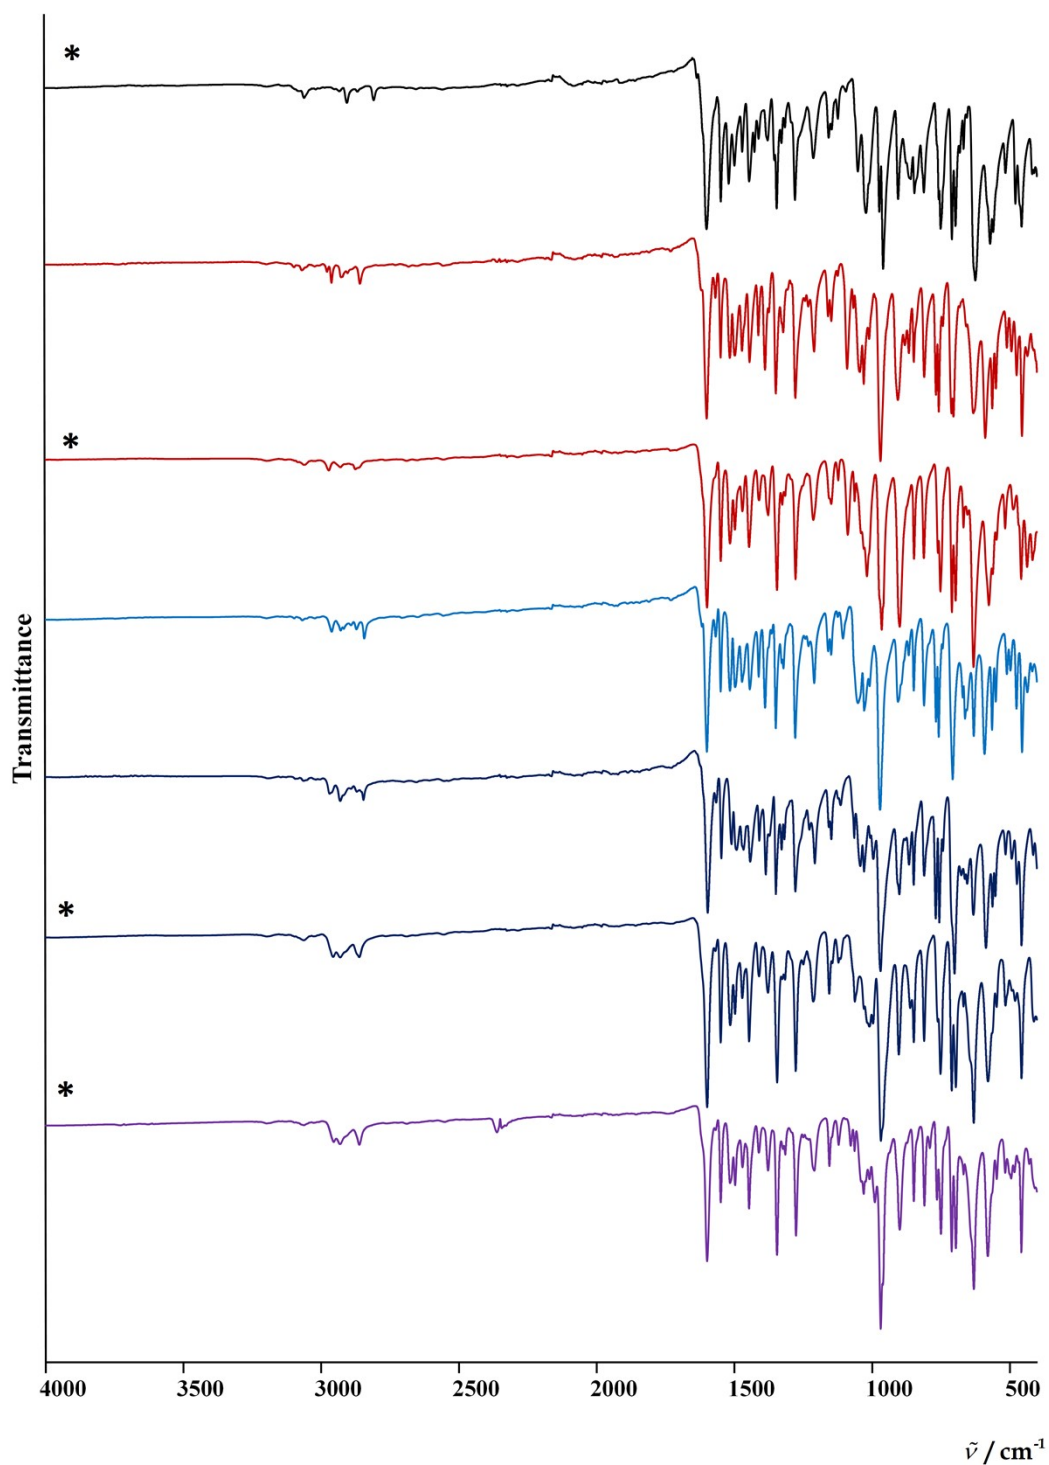

**Fig. S12** IR-ATR spectra of coordination polymers (compounds belonging to the  $\beta$  series are marked with an asterisk):  $[\text{VO}(\text{SiH})(\text{OCH}_3)]_n \cdot 0.25\text{MeOH}$  ( $1\beta \cdot 0.25\text{CH}_3\text{OH}$ ),  $[\text{VO}(\text{SiH})(\text{OC}_2\text{H}_5)]_n$  ( $2\alpha$ ),  $[\text{VO}(\text{SiH})(\text{OC}_2\text{H}_5)]_n \cdot 0.25\text{C}_2\text{H}_5\text{OH}$  ( $2\beta \cdot 0.25\text{C}_2\text{H}_5\text{OH}$ ),  $[\text{VO}(\text{SiH})(\text{OC}_3\text{H}_7)]_n$  ( $3\alpha$ ),  $[\text{VO}(\text{SiH})(\text{OC}_4\text{H}_9)]_n$  ( $4\alpha$ ),  $[\text{VO}(\text{SiH})(\text{OC}_4\text{H}_9)]_n$  ( $4\beta$ ),  $[\text{VO}(\text{SiH})(\text{OC}_4\text{H}_9)]_n$  ( $5\beta$ ) (from top to bottom).

## 1.6. TGA

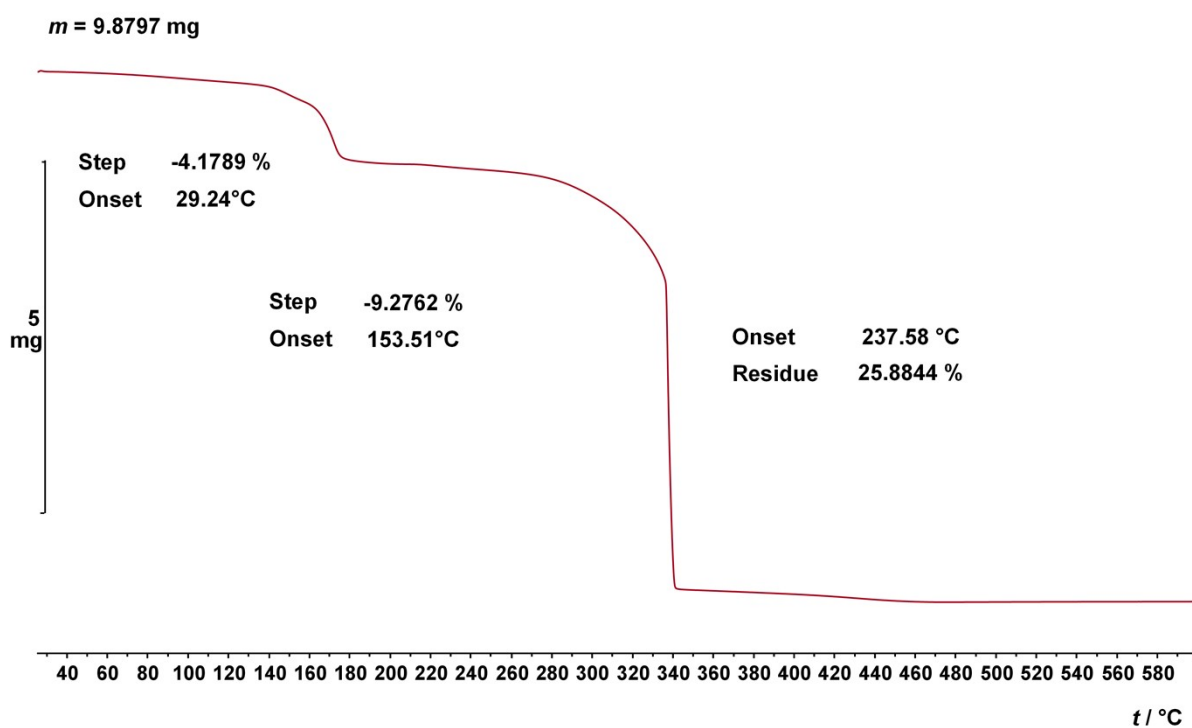

**Fig. S13** TG curve of  $[\text{VO}(\text{SiH})(\text{OCH}_3)_4] \cdot 2\text{MeOH}$  ( $1\mathbf{t} \cdot 2\text{CH}_3\text{OH}$ ) under the  $\text{O}_2$  atmosphere in the range of 25 - 600 °C. Experiment was recorded with a heating rate of  $5 \text{ }^\circ\text{C min}^{-1}$  in a dynamic atmosphere with a flow rate of  $200 \text{ cm}^3 \text{ min}^{-1}$ .

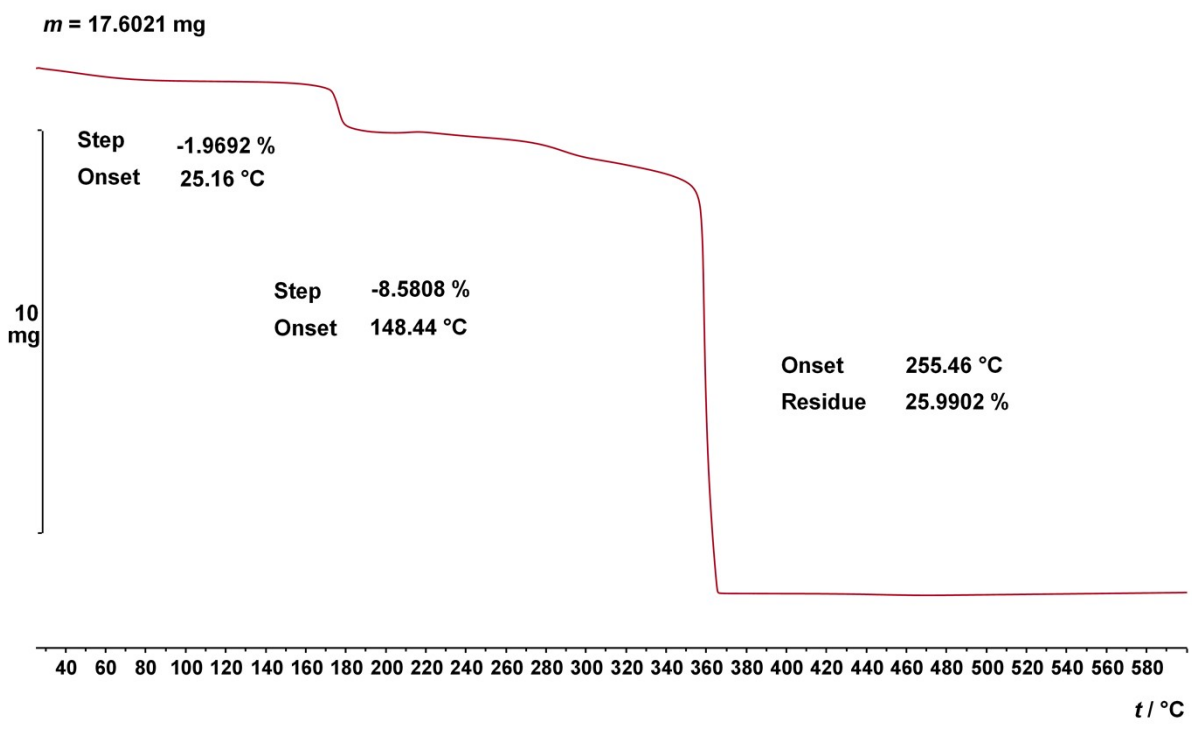

**Fig. S14** TG curve of  $1\beta \cdot 0.25 \text{ CH}_3\text{OH}$  under the  $\text{O}_2$  atmosphere in the range of 25 - 600 °C. Experiment was recorded with a heating rate of  $5 \text{ °C min}^{-1}$  in a dynamic atmosphere with a flow rate of  $200 \text{ cm}^3 \text{ min}^{-1}$ .

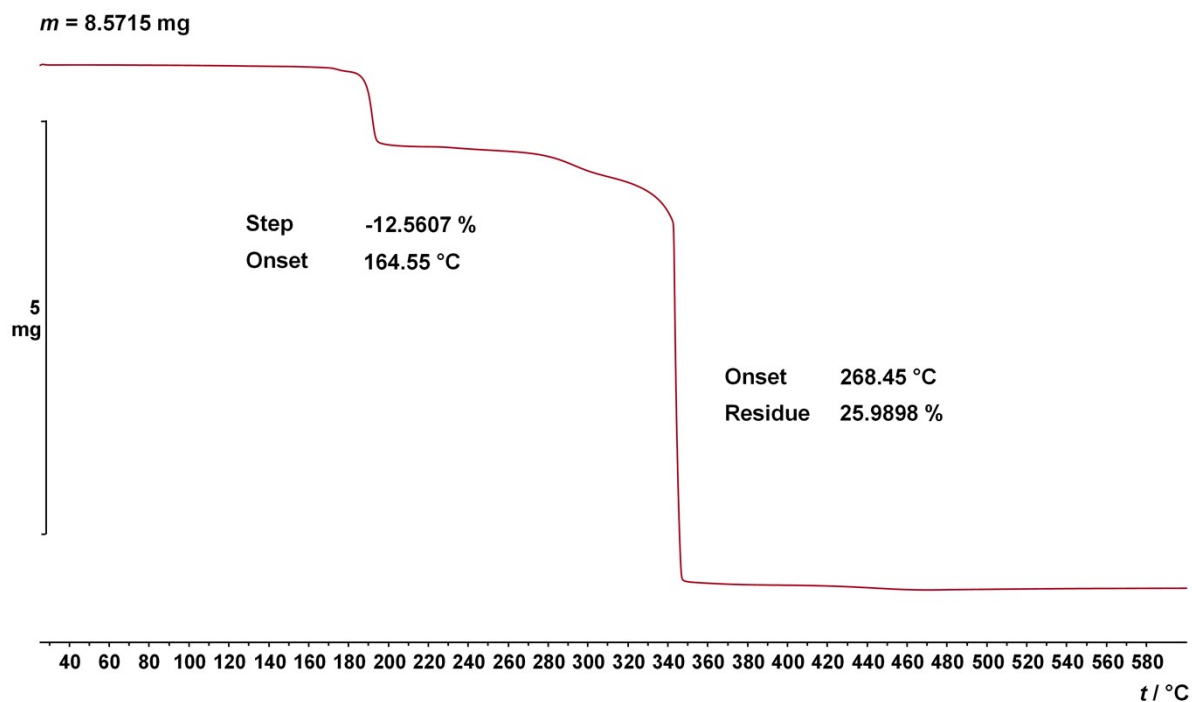

**Fig. S15** TG curve of  $2\alpha$  under the  $\text{O}_2$  atmosphere in the range of 25 - 600 °C. Experiment was recorded with a heating rate of  $5 \text{ °C min}^{-1}$  in a dynamic atmosphere with a flow rate of  $200 \text{ cm}^3 \text{ min}^{-1}$ .

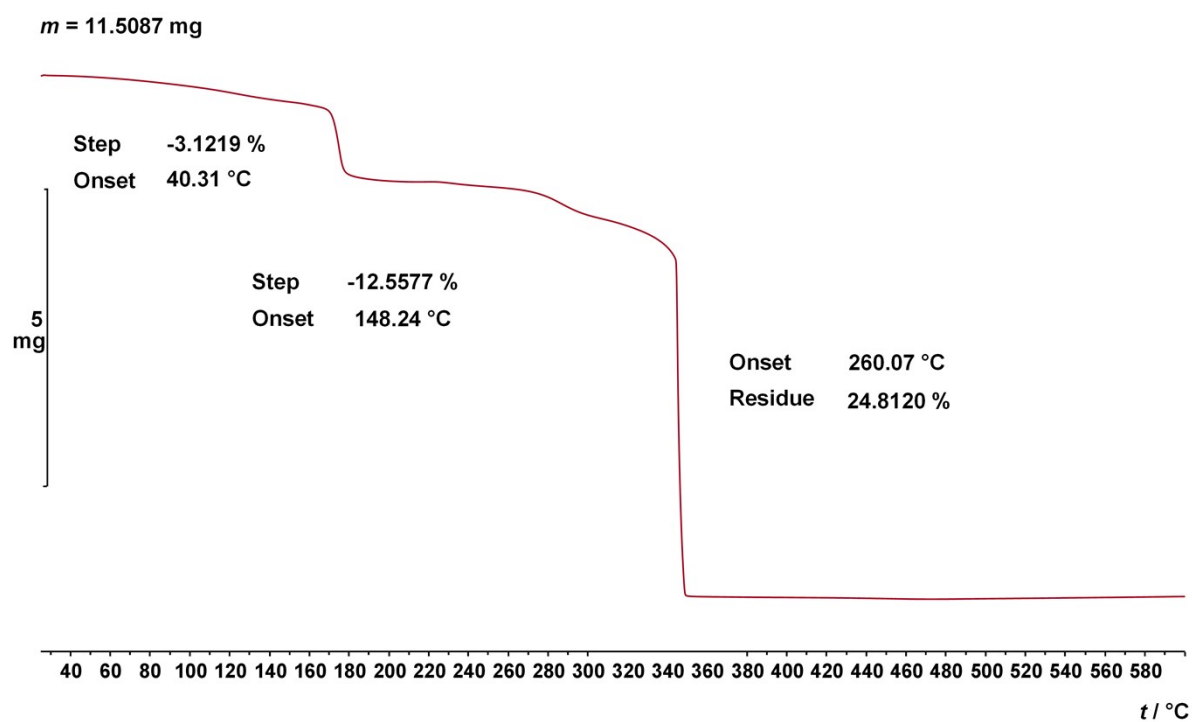

**Fig. S16** TG curve of  $2\beta \cdot 0.25\text{CH}_3\text{OH}$  under the  $\text{O}_2$  atmosphere in the range of 25 - 600 °C. Experiment was recorded with a heating rate of  $5 \text{ °C min}^{-1}$  in a dynamic atmosphere with a flow rate of  $200 \text{ cm}^3 \text{ min}^{-1}$ .

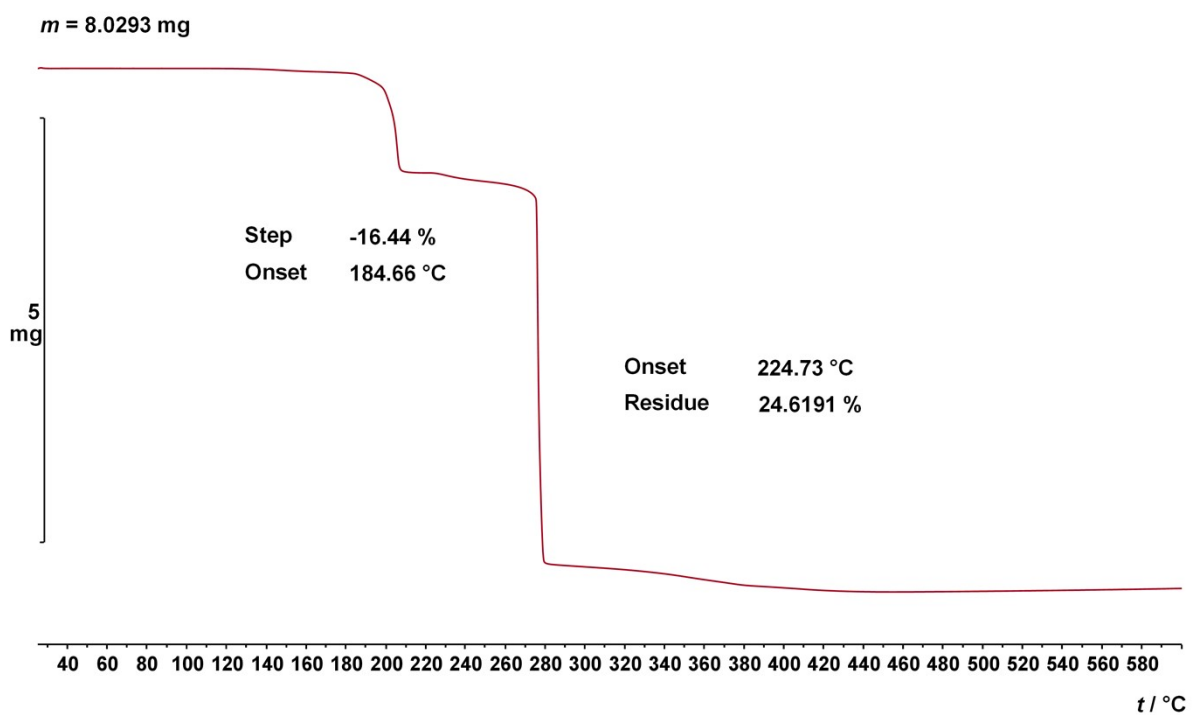

**Fig. S17** TG curve of **3α** under the O<sub>2</sub> atmosphere in the range of 25 - 600 °C. Experiment was recorded with a heating rate of 5 °C min<sup>-1</sup> in a dynamic atmosphere with a flow rate of 200 cm<sup>3</sup> min<sup>-1</sup>.

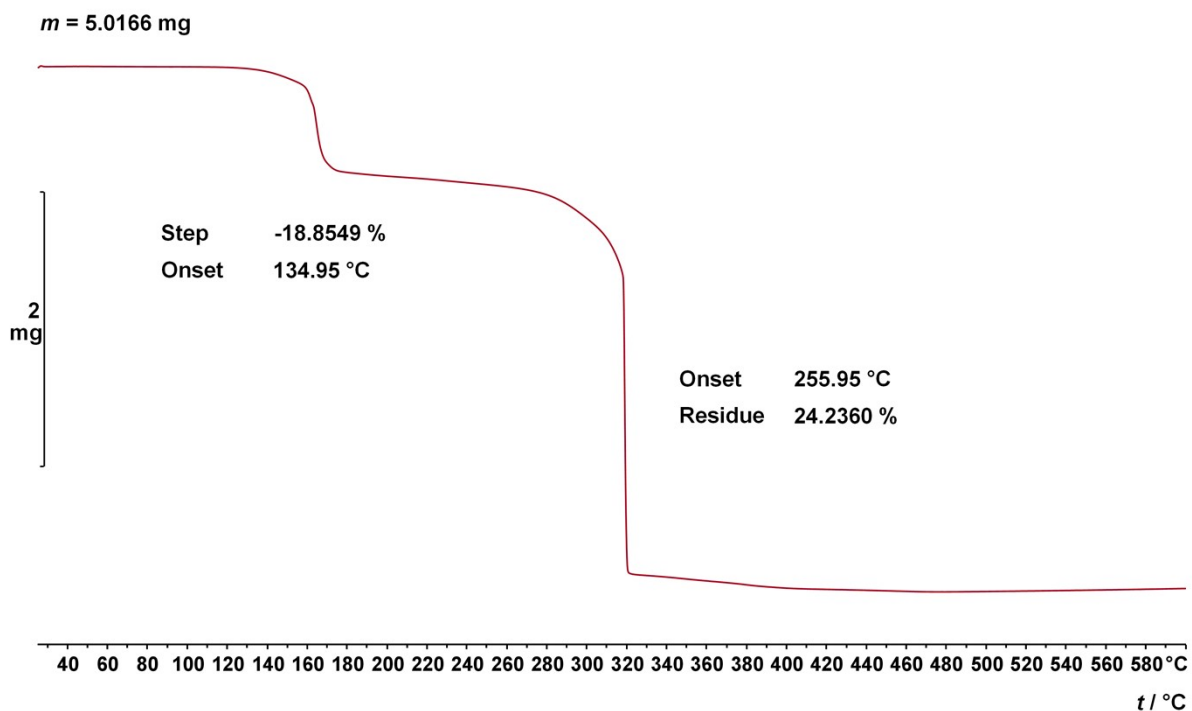

**Fig. S18** TG curve of **4α** under the O<sub>2</sub> atmosphere in the range of 25 - 600 °C. Experiment was recorded with a heating rate of 5 °C min<sup>-1</sup> in a dynamic atmosphere with a flow rate of 200 cm<sup>3</sup> min<sup>-1</sup>.

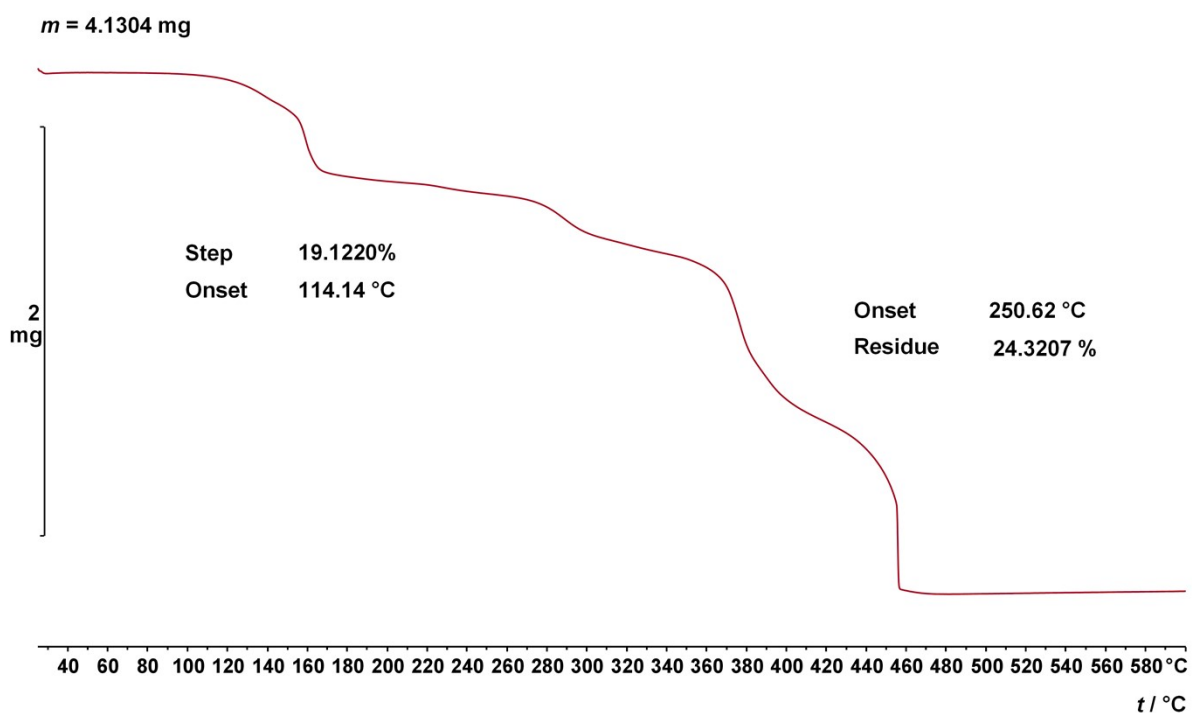

**Fig. S19** TG curve of **4β** under the O<sub>2</sub> atmosphere in the range of 25 - 600 °C. Experiment was recorded with a heating rate of 5 °C min<sup>-1</sup> in a dynamic atmosphere with a flow rate of 200 cm<sup>3</sup> min<sup>-1</sup>.

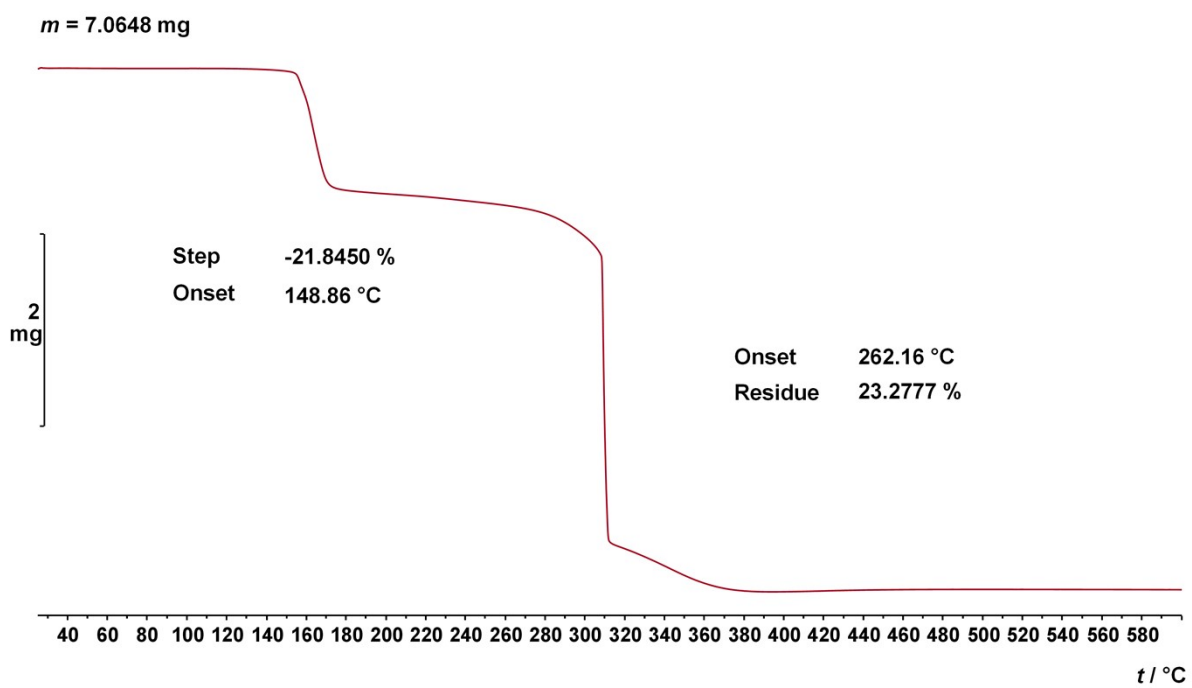

**Fig. S20** TG curve of **5 $\beta$**  under the O<sub>2</sub> atmosphere in the range of 25 - 600 °C. Experiment was recorded with a heating rate of 5 °C min<sup>-1</sup> in a dynamic atmosphere with a flow rate of 200 cm<sup>3</sup> min<sup>-1</sup>.



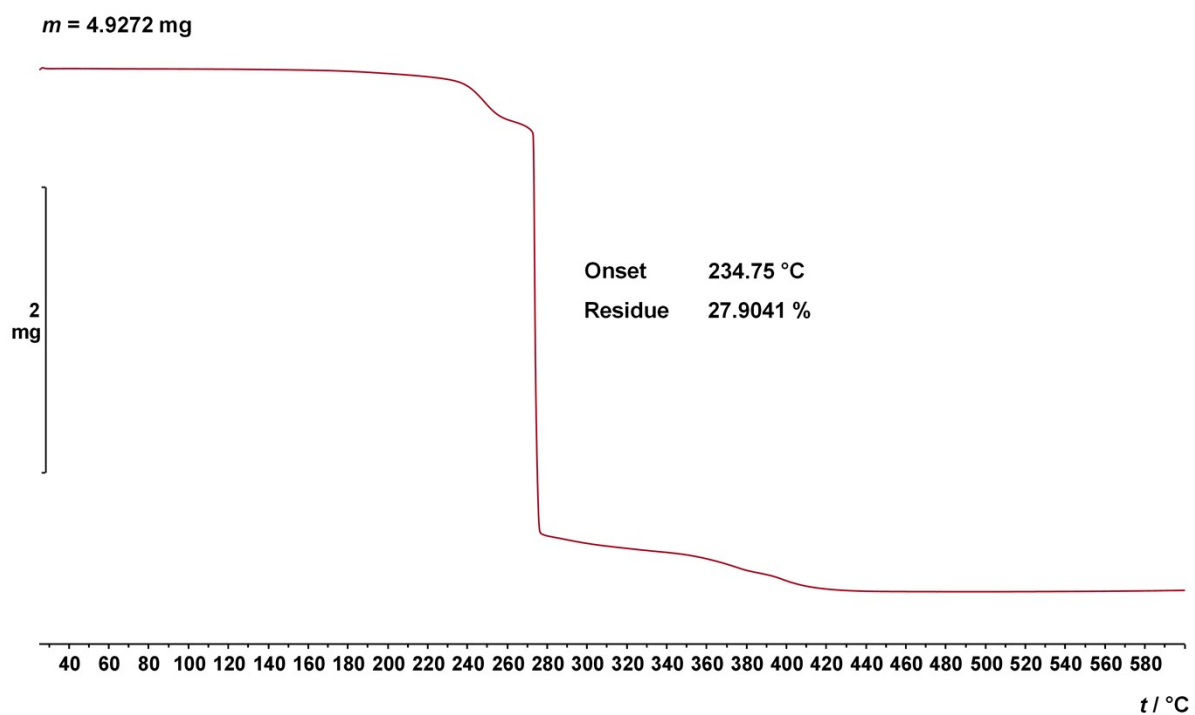

**Fig. S21** TG curve of **6** under the O<sub>2</sub> atmosphere in the range of 25 - 600 °C. Experiment was recorded with a heating rate of 5 °C min<sup>-1</sup> in a dynamic atmosphere with a flow rate of 200 cm<sup>3</sup> min<sup>-1</sup>.

## References

---

- <sup>1</sup> T. Degen, M. Sadki, E. Bron, U. König, G. Nénert, The High Score suite. *Powder Diffr.* 2014, **29**, S13–S18. <https://doi.org/10.1017/s0885715614000840>
- <sup>2</sup> Rigaku Oxford Diffraction. CrysAlisPro Software System, Version 1.171.42.49; Rigaku Oxford Diffraction: Oxford, UK, 2020.
- <sup>3</sup> G. M. Sheldrick, SHELXT– Integrated space-group and crystal-structure determination. *Acta Crystallogr. A Found. Adv.* **2015**, 71, 3–8. doi:10.1107/s2053273314026370
- <sup>4</sup> G. M. Sheldrick, Crystal structure refinement with SHELXL. *Acta Crystallogr. C Struct. Chem.* 2015, **71**, 3–8. doi:10.1107/s2053229614024218.
- <sup>5</sup> O. V. Dolomanov, L. J. Bourhis, R. J. Gildea, J. A. K. Howard, Puschmann, H. OLEX2: a complete structure solution, refinement and analysis program. *J. Appl. Crystallogr.* **2009**, 42, 339–341. doi:10.1107/s0021889808042726.
- <sup>6</sup> A. L. Spek, Structure validation in chemical crystallography. *Acta Crystallogr. D Biol. Crystallogr.* **2009**, 65, 148–155. doi:10.1107/s090744490804362x.
- <sup>7</sup> C. R. Groom, I. J. Bruno, M. P. Lightfoot, S. C. Ward, The Cambridge Structural Database. *Acta Crystallogr. B Struct. Sci. Cryst. Eng. Mater.* **2016**, 72, 171–179. doi:10.1107/s2052520616003954
